# Supplementary material for: The Whole Set of Constitutive Promoters Recognized by RNA Polymerase RpoD Holoenzyme of Escherichia coli
Source: PubMed Central journal article supplement (PMC3946193; doi:10.1371/journal.pone.0090447), 2014-03-06
Supplement: pone.0090447.s001.pdf [file pone.0090447.s001.pdf]

Supplemental Table S1A

RNA Polymerase RpoD Holoenzyme-Binding Sites on the *E. coli* Genome (Cut-off level, 2.0)

| Position | Function                                         | Left Gene     | D | RpoD | D | Right Gene  | Function                                       | Level |
|----------|--------------------------------------------------|---------------|---|------|---|-------------|------------------------------------------------|-------|
| 41946    | carnitine BCCT transporter                       | <i>caiT</i>   | < |      | > | <i>fixA</i> | anaerobic carnitine metabolism                 | 0.05  |
| 113368   | dephospho-CoA kinase                             | <i>coaE</i>   | < |      | > | <i>guaC</i> | GMP reductase                                  | 0.04  |
| 141230   | glucose dehydrogenase                            | <i>gcd</i>    | < |      | > | <i>hpt</i>  | hypoxanthine-guanine phosphoribosyltransferase | 0.23  |
| 142654   | carbonic anhydrase 2                             | <i>can</i>    | < |      | > | <i>yadG</i> | predicted ABC transporter                      | 0.04  |
| 243432   | acyl-CoA dehydrogenase                           | <i>fadE</i>   | < |      | > | <i>lpcA</i> | D-sedoheptulose 7-phosphate isomerase          | 0.06  |
| 246530   | YafQ-DinJ system antitoxin                       | <i>dinJ</i>   | < |      | > | <i>yafL</i> | lipoprotein and C40 family peptidase           | 0.11  |
| 259470   | outer membrane phosphoprotein E                  | <i>phoE</i>   | < |      | > | <i>proB</i> | glutamate-5-kinase                             | 0.10  |
| 281364   | CP4-6 prophage transcriptional regulator         | <b>yagA</b>   | < |      | > | <i>yagE</i> | CP4-6 prophage lyase/synthase                  | 0.04  |
| 310970   | predicted regulator                              | <i>matA</i>   | < |      | > | <i>ykgL</i> | predicted protein                              | 0.04  |
| 328568   | transcription regulator                          | <b>betI</b>   | < |      | > | <i>betT</i> | BetT choline BCCT transporter                  | 0.36  |
| 383958   | conserved protein                                | <i>yaiS</i>   | < |      | > | <i>tauA</i> | taurine transporter                            | 0.07  |
| 563962   | transcription regulator                          | <b>fimZ</b>   | < |      | > | <i>argU</i> | tRNA-argU                                      | 0.03  |
| 607040   | carboxylateamine ligase                          | <i>ybdK</i>   | < |      | > | <i>hokE</i> | small toxic polypeptide                        | 0.10  |
| 611830   | enterochelin receptor outer membrane receptor    | <i>fepA</i>   | < |      | > | <i>fes</i>  | enterochelin esterase                          | 0.16  |
| 621536   | iron-enterobactin transporter                    | <i>fepD</i>   | < |      | > | <i>entS</i> | EntS MFS transporter                           | 0.23  |
| 623866   | iron-enterobactin transporter                    | <i>fepB</i>   | < |      | > | <i>entC</i> | isochorismate synthase 1                       | 0.06  |
| 637856   | thiol:disulfide interchange protein              | <i>dsbG</i>   | < |      | > | <i>ahpC</i> | alkyl hydroperoxide reductase                  | 0.04  |
| 702948   | glucosamine-6-phosphate deaminase                | <i>nagB</i>   | < |      | > | <i>nagE</i> | N-acetyl glucosamine PTS enzyme                | 0.09  |
| 753948   | citrate synthase                                 | <i>gltA</i>   | < |      | > | <i>sdhC</i> | succinate dehydrogenase membrane protein       | 0.04  |
| 765072   | transcription regulator                          | <b>mngR</b>   | < |      | > | <i>mngA</i> | 2-O-a-mannosyl-D-glycerate PTS enzyme          | 0.07  |
| 812472   | hypothetical protein                             | <i>ybhU</i>   | < |      | > | <i>uvrB</i> | DNA repair excision nuclease                   | 0.10  |
| 849568   | threonine and homoserine exporter                | <i>rhtA</i>   | < |      | > | <i>ompX</i> | outer membrane protein X                       | 0.16  |
| 852256   | RybA small RNA                                   | <i>rybA</i>   | < |      | > | <b>mntR</b> | transcription regulator                        | 0.17  |
| 889170   | predicted transporter                            | <i>ybjL</i>   | < |      | > | <i>ybjM</i> | predicted inner membrane protein               | 0.17  |
| 1020252  | SOS cell division inhibitor                      | <i>sulA</i>   | < |      | > | <i>sxy</i>  | transcriptional coactivator for CRP            | 0.16  |
| 1102554  | transcription regulator                          | <b>csgD</b>   | < |      | > | <i>csgB</i> | curlin minor subunit                           | 0.24  |
| 1103068  | transcription regulator                          | <b>csgD</b>   | < |      | > | <i>csgB</i> | curlin minor subunit                           | 0.04  |
| 1108470  | periplasmic glucan succinyl modification protein | <b>mdoC</b>   | < |      | > | <i>mdoG</i> | periplasmic glucan (MDO) biosynthesis protein  | 0.33  |
| 1115832  | lauroyl acyltransferase                          | <i>lpxL</i>   | < |      | > | <i>yceA</i> | conserved protein                              | 0.05  |
| 1197570  | e14 prophage inner membrane protein              | <i>ymfE</i>   | < |      | > | <i>lit</i>  | e14 prophage cell death peptidase              | 0.14  |
| 1226764  | g-type lysozyme inhibitor                        | <i>pliG</i>   | < |      | > | <i>ycgL</i> | conserved protein                              | 0.32  |
| 1234072  | sodium/proton transporter                        | <i>nhaB</i>   | < |      | > | <b>fadR</b> | transcription regulator                        | 0.03  |
| 1236636  | conserved protein                                | <i>ycgB</i>   | < |      | > | <i>dadA</i> | D-amino acid dehydrogenase                     | 0.06  |
| 1258038  | peptidyl-tRNA hydrolase                          | <i>pth</i>    | < |      | > | <i>yehH</i> | stress-induced protein                         | 0.12  |
| 1292540  | transcription regulator                          | <b>hns</b>    | < |      | > | <i>tdk</i>  | thymidine-deoxyuridine kinase                  | 0.04  |
| 1297734  | alcohol dehydrogenase/cetaldehyde dehydrogenase  | <i>adhE</i>   | < |      | > | <i>yehE</i> | predicted inner membrane protein               | 0.14  |
| 1386966  | lipid hydroperoxide peroxidase                   | <i>tpx</i>    | < |      | > | <i>ycjG</i> | L-Ala-D/L-Glu epimerase                        | 0.07  |
| 1389946  | predicted hydrolase                              | <i>ycjY</i>   | < |      | > | <b>ycjZ</b> | transcription regulator                        | 0.06  |
| 1440860  | D-lactate dehydrogenase                          | <i>ldhA</i>   | < |      | > | <i>ydbH</i> | predicted protein                              | 0.30  |
| 1480954  | NADH-azoreductase, FMN-dependent                 | <i>azoR</i>   | < |      | > | <i>hrpA</i> | ATP-dependent helicase                         | 0.07  |
| 1488764  | glyceraldehyde 3-phosphate dehydrogenase C       | <i>gapC</i>   | < |      | > | <i>cybB</i> | cytochrome b561                                | 0.06  |
| 1489562  | RydC small RNA                                   | <i>rydC</i>   | < |      | > | <i>ycdA</i> | hypothetical protein                           | 0.04  |
| 1493268  | transcription regulator                          | <b>ycdI</b>   | < |      | > | <i>ycdJ</i> | conserved protein                              | 0.06  |
| 1507266  | predicted protein                                | <i>yncJ</i>   | < |      | > | <i>hicA</i> | HicAB toxin                                    | 0.04  |
| 1554348  | biofilm-dependent modulation protein             | <i>bdm</i>    | < |      | > | <b>osmC</b> | osmotically inducible peroxidase               | 0.09  |
| 1612752  | succinate semialdehyde dehydrogenase             | <i>sad</i>    | < |      | > | <b>yneJ</b> | transcription regulator                        | 0.12  |
| 1616964  | predicted transporter                            | <i>marC</i>   | < |      | > | <b>marR</b> | transcription regulator                        | 0.03  |
| 1630740  | predicted transporter                            | <i>ydfJ</i>   | < |      | > | <b>ydfK</b> | Qin prophage transcription regulator           | 0.14  |
| 1717842  | anhydro-N-acetylmuramic acid kinase              | <i>anmK</i>   | < |      | > | <i>slyB</i> | outer membrane lipoprotein                     | 0.04  |
| 1732144  | glutaredoxin 4                                   | <i>grxD</i>   | < |      | > | <i>ydhO</i> | predicted lipoprotein                          | 0.05  |
| 1737846  | transcription regulator                          | <b>ydhB</b>   | < |      | > | <i>ydhC</i> | YdhC drug MFS transporter                      | 0.04  |
| 1753332  | predicted protein                                | <i>ydhZ</i>   | < |      | > | <i>pykF</i> | pyruvate kinase I monomer                      | 0.06  |
| 1800650  | threonyl-tRNA synthetase                         | <i>thrS</i>   | < |      | > | <i>arpB</i> | predicted protein                              | 0.04  |
| 1908132  | transcription regulator                          | <b>kdgR</b>   | < |      | > | <i>yebQ</i> | predicted transporter                          | 0.18  |
| 1921040  | protein phosphatase 1                            | <i>pphA</i>   | < |      | > | <i>ryeA</i> | RyeA small RNA                                 | 0.05  |
| 1944202  | small protein                                    | <i>yobI</i>   | < |      | > | <b>yebB</b> | predicted protein                              | 0.04  |
| 1948750  | aspartyl-tRNA synthetase                         | <i>aspS</i>   | < |      | > | <i>yecD</i> | predicted hydrolase                            | 0.07  |
| 2006256  | predicted protein                                | <i>yedD</i>   | < |      | > | <i>yedE</i> | predicted inner membrane protein               | 0.04  |
| 2023330  | DsrA RNA                                         | <i>dsrA</i>   | < |      | > | <i>yedP</i> | predicted phosphatase                          | 0.04  |
| 2036832  | transcription regulator                          | <b>yedW</b>   | < |      | > | <i>yedX</i> | conserved protein                              | 0.14  |
| 2065860  | IS5 transposase and trans-activator              | <i>insH-6</i> | < |      | > | <i>yoeA</i> | CP4-44 prophage hemin or colicin receptor      | 0.05  |
| 2066688  | IS5 transposase and trans-activator              | <i>insH-6</i> | < |      | > | <i>yoeA</i> | CP4-44 prophage hemin or colicin receptor      | 0.18  |

|         |                                                  |               |   |   |               |                                                         |      |
|---------|--------------------------------------------------|---------------|---|---|---------------|---------------------------------------------------------|------|
| 2087740 | YoeB-YefM toxin transcription regulator          | <b>yefM</b>   | < | > | <b>hisL</b>   | his operon leader peptide                               | 0.30 |
| 2228572 | tRNA dihydrouridine synthase                     | <b>dusC</b>   | < | > | <b>yohJ</b>   | conserved inner membrane protein                        | 0.12 |
| 2241932 | GTP cyclohydrolase I monomer                     | <b>folE</b>   | < | > | <b>yeiG</b>   | S-lactoylglutathione hydrolase/S-formylglutathione      | 0.05 |
| 2247764 | transcription regulator                          | <b>yeiE</b>   | < | > | <b>yeiH</b>   | conserved inner membrane protein                        | 0.06 |
| 2301638 | ferredoxin-type protein                          | <b>napF</b>   | < | > | <b>yojO</b>   | hypothetical protein                                    | 0.06 |
| 2310860 | outer membrane protein OmpC                      | <b>ompC</b>   | < | > | <b>micF</b>   | MicF antisense RNA                                      | 0.07 |
| 2362346 | outer membrane protein                           | <b>yfaZ</b>   | < | > | <b>nudI</b>   | pyrimidine deoxynucleoside triphosphate pyrophosphatase | 0.04 |
| 2404652 | transcription regulator                          | <b>lrhA</b>   | < | > | <b>alaA</b>   | glutamate-pyruvate aminotransferase                     | 0.08 |
| 2405036 | transcription regulator                          | <b>lrhA</b>   | < | > | <b>alaA</b>   | glutamate-pyruvate aminotransferase                     | 0.53 |
| 2411432 | conserved inner membrane protein                 | <b>yfbV</b>   | < | > | <b>ackA</b>   | propionate kinase/acetate kinase                        | 0.04 |
| 2481772 | EmrK putative membrane fusion protein            | <b>emrK</b>   | < | > | <b>evgA</b>   | transcription regulator                                 | 0.45 |
| 2493362 | predicted inner membrane protein                 | <b>yfdY</b>   | < | > | <b>lpxP</b>   | palmitoleoyl acyltransferase                            | 0.17 |
| 2507630 | glucokinase                                      | <b>glk</b>    | < | > | <b>yfeO</b>   | predicted ion channel protein                           | 0.06 |
| 2510752 | manganese ion NRAMP transporter                  | <b>mntH</b>   | < | > | <b>nupC</b>   | nucleoside NUP transporter                              | 0.21 |
| 2524952 | transcription regulator                          | <b>yfeR</b>   | < | > | <b>yfeH</b>   | putative cytochrome oxidase                             | 0.04 |
| 2550354 | predicted acyltransferase                        | <b>ypeA</b>   | < | > | <b>amiA</b>   | N-acetylmuramoyl-L-alanine amidase 1                    | 0.86 |
| 2583536 | putative oxidoreductase                          | <b>aegA</b>   | < | > | <b>narQ</b>   | NarPQ TCS sensory histidine kinase                      | 0.05 |
| 2589272 | small protein                                    | <b>ypfM</b>   | < | > | <b>yffB</b>   | conserved protein                                       | 0.10 |
| 2597942 | dihydrodipicolinate synthase                     | <b>dapA</b>   | < | > | <b>gcvR</b>   | transcription regulator                                 | 0.03 |
| 2618872 | uracil phosphoribosyltransferase                 | <b>upp</b>    | < | > | <b>purM</b>   | phosphoribosylaminoimidazole synthetase                 | 0.09 |
| 2632266 | IMP dehydrogenase                                | <b>guaB</b>   | < | > | <b>xseA</b>   | exonuclease VII                                         | 0.10 |
| 2661336 | tRNA:Cm32/Um32 methyltransferase                 | <b>trmJ</b>   | < | > | <b>suhB</b>   | inositol monophosphatase                                | 0.26 |
| 2683870 | serine hydroxymethyltransferase                  | <b>glyA</b>   | < | > | <b>hmp</b>    | NO dioxygenase/dihydropteridine reductase 2             | 0.19 |
| 2708460 | RNA polymerase, sigma E factor                   | <b>rpoE</b>   | < | > | <b>nadB</b>   | L-aspartate oxidase                                     | 0.18 |
| 2752830 | toxin of a putative toxin-antitoxin pair         | <b>ratA</b>   | < | > | <b>smpB</b>   | small protein B                                         | 0.26 |
| 2784038 | tRNA-Ile                                         | <b>ileY</b>   | < | > | <b>ygaQ_1</b> | predicted protein                                       | 0.22 |
| 2795244 | predicted membrane protein                       | <b>yqaE</b>   | < | > | <b>ygaV</b>   | transcription regulator                                 | 0.17 |
| 2823668 | membrane-bound lytic murein transglycosylase B   | <b>mitB</b>   | < | > | <b>srlA</b>   | glucitol/sorbitol-specific PTS IIC                      | 0.07 |
| 2859462 | DNA-binding transcriptional regulator, DEOR-type | <b>ygbI</b>   | < | > | <b>ygbJ</b>   | predicted NAD(P)-binding dehydrogenase                  | 0.05 |
| 2890256 | sulfite reductase, flavoprotein subunit          | <b>cysJ</b>   | < | > | <b>queD</b>   | 6-carboxy-5,6,7,8-tetrahydropterin synthase             | 0.04 |
| 2903434 | conserved protein                                | <b>queE</b>   | < | > | <b>yqcG</b>   | envelope stress response small protein                  | 0.25 |
| 2977048 | diaminopimelate decarboxylase                    | <b>lysA</b>   | < | > | <b>lysR</b>   | transcription regulator                                 | 0.04 |
| 3053570 | predicted protein                                | <b>ygfB</b>   | < | > | <b>zapA</b>   | cytokinetic ring protein                                | 0.16 |
| 3126270 | glycolate oxidase                                | <b>glcD</b>   | < | > | <b>glcC</b>   | transcription regulator                                 | 0.06 |
| 3190146 | predicted glycogen synthesis protein             | <b>glgS</b>   | < | > | <b>yqjJ</b>   | putative oxidoreductase                                 | 0.17 |
| 3214730 | predicted siderophore interacting protein        | <b>yqjH</b>   | < | > | <b>yqjI</b>   | transcription regulator                                 | 0.33 |
| 3217532 | aerotaxis sensor receptor, flavoprotein          | <b>aer</b>    | < | > | <b>ygjG</b>   | putrescine aminotransferase/diamine transaminase        | 0.20 |
| 3338068 | phospholipid ABC transporter                     | <b>miaF</b>   | < | > | <b>yrbG</b>   | YrbG CaCA transporter                                   | 0.05 |
| 3411666 | transcription regulator                          | <b>envR</b>   | < | > | <b>acrE</b>   | transmembrane protein                                   | 0.04 |
| 3431738 | conserved protein                                | <b>smf</b>    | < | > | <b>def</b>    | peptide deformylase                                     | 0.15 |
| 3559934 | thiosulfate sulfurtransferase                    | <b>glpE</b>   | < | > | <b>glpD</b>   | glycerol 3-phosphate dehydrogenase                      | 0.69 |
| 3635668 | FAD/NAD(P)-binding oxidoreductase                | <b>yhiN</b>   | < | > | <b>pitA</b>   | PitA phosphate transporter                              | 0.07 |
| 3646262 | damage-inducible protein                         | <b>dinQ</b>   | < | > | <b>arsR</b>   | transcription regulator                                 | 0.12 |
| 3651236 | IS5 transposase and trans-activator              | <b>insH</b>   | < | > | <b>slp</b>    | starvation lipoprotein                                  | 0.14 |
| 3651858 | IS5 transposase and trans-activator              | <b>insH</b>   | < | > | <b>slp</b>    | starvation lipoprotein                                  | 0.14 |
| 3735330 | conserved protein                                | <b>bax</b>    | < | > | <b>malS</b>   | alpha-amylase                                           | 0.18 |
| 3769870 | predicted inner membrane protein                 | <b>yibl</b>   | < | > | <b>mtIA</b>   | mannitol PTS permease                                   | 0.04 |
| 3806148 | lipopolysaccharide core heptosyl transferase III | <b>waaQ</b>   | < | > | <b>waaA</b>   | KDO transferase                                         | 0.11 |
| 3819438 | DNA ligase                                       | <b>ligB</b>   | < | > | <b>gmk</b>    | deoxyguanylate/guanylate kinase                         | 0.20 |
| 3834134 | GPH transporter                                  | <b>yicJ</b>   | < | > | <b>selC</b>   | tRNA-sec (selenocysteine)                               | 0.04 |
| 3851352 | IstR-2 RNA                                       | <b>istR-2</b> | < | > | <b>tisA</b>   | phantom gene                                            | 0.74 |
| 3925170 | transcription regulator                          | <b>asnC</b>   | < | > | <b>asnA</b>   | asparagine synthetase                                   | 0.12 |
| 3948344 | predicted ATP-dependent protease                 | <b>yifB</b>   | < | > | <b>ilvL</b>   | ilvGEDA operon leader peptide                           | 0.04 |
| 3984454 | arylsulfatase                                    | <b>asiA</b>   | < | > | <b>glmZ</b>   | GlmZ small RNA                                          | 0.98 |
| 3988832 | hydroxymethylbilane synthase                     | <b>hemC</b>   | < | > | <b>cyaA</b>   | adenylate cyclase                                       | 0.09 |
| 4083972 | formate dehydrogenase-Ot                         | <b>fdoG</b>   | < | > | <b>fdhD</b>   | affects formate dehydrogenase-N                         | 0.22 |
| 4103830 | transcription regulator                          | <b>cpxR</b>   | < | > | <b>cpxP</b>   | Cpx response regulator                                  | 0.06 |
| 4116232 | glycerol MIP channel                             | <b>glpF</b>   | < | > | <b>zapB</b>   | cell division factor ZapB                               | 0.28 |
| 4124862 | primosome factor N1                              | <b>priA</b>   | < | > | <b>rpmE</b>   | 50S ribosomal subunit protein L31                       | 0.03 |
| 4126572 | transcription regulator                          | <b>metJ</b>   | < | > | <b>metB</b>   | O-succinylhomoserine lyase                              | 0.17 |
| 4228166 | dipeptidase E                                    | <b>pepE</b>   | < | > | <b>rluF</b>   | 23S rRNA pseudouridine 2604 synthase                    | 0.03 |
| 4231546 | aspartate aminotransferase                       | <b>lysC</b>   | < | > | <b>pgi</b>    | 6-phosphogluconolactonase                               | 0.06 |
| 4262332 | quinone oxidoreductase                           | <b>qor</b>    | < | > | <b>dnaB</b>   | replicative DNA helicase                                | 0.06 |
| 4272050 | excision nuclease                                | <b>uvrA</b>   | < | > | <b>ssb</b>    | ssDNA-binding protein                                   | 0.67 |
| 4273156 | predicted inner membrane protein                 | <b>yjcB</b>   | < | > | <b>yjcC</b>   | c-di-GMP-specific phosphodiesterase                     | 0.11 |
| 4368630 | APC transporter                                  | <b>yjeH</b>   | < | > | <b>groS</b>   | GroES chaperone                                         | 0.12 |
| 4417636 | L-ascorbate 6-phosphate lactonase                | <b>ulaG</b>   | < | > | <b>ulaA</b>   | L-ascorbate PTS permease                                | 0.16 |

|         |                                                |             |   |   |             |                                    |      |
|---------|------------------------------------------------|-------------|---|---|-------------|------------------------------------|------|
| 4422860 | predicted protein                              | <i>yjFY</i> | < | > | <i>rpsF</i> | 30S ribosomal subunit protein S6   | 0.07 |
| 4432132 | NAD(P)H:quinone oxidoreductase                 | <i>ytfG</i> | < | > | <i>ytfH</i> | transcription regulator            | 0.25 |
| 4472066 | predicted NAD(P)-binding oxidoreductase        | <i>bdcA</i> | < | > | <i>bdcR</i> | transcription regulator            | 0.31 |
| 4476464 | ornithine carbamoyltransferase                 | <i>argI</i> | < | > | <i>rraB</i> | ribonuclease E inhibitor protein B | 0.07 |
| 4477556 | predicted acetyltransferase                    | <i>yjgM</i> | < | > | <i>yjgN</i> | conserved inner membrane protein   | 0.14 |
| 4502056 | IS1 predicted transposase                      | <i>insG</i> | < | > | <i>yjhB</i> | YjhB MFS transporter               | 0.07 |
| 4538050 | N-acetylneuraminic acid outer membrane channel | <i>nanC</i> | < | > | <i>fimB</i> | <i>fim</i> promoter switch         | 0.04 |
| 4538758 | N-acetylneuraminic acid outer membrane channel | <i>nanC</i> | < | > | <i>fimB</i> | <i>fim</i> promoter switch         | 0.32 |
| 4569666 | transcription regulator                        | <i>yjIR</i> | < | > | <i>yjIS</i> | conserved protein                  | 0.03 |
| 4601330 | predicted inner membrane protein               | <i>yjJP</i> | < | > | <i>yjJQ</i> | transcription regulator            | 0.04 |
| 4603830 | ferrioxamine B iron utilization                | <i>fhuF</i> | < | > | <i>yjJZ</i> | predicted protein                  | 0.20 |
| 4633370 | transcription regulator                        | <i>rob</i>  | < | > | <i>creA</i> | conserved protein                  | 0.03 |
| 4638418 | transcription regulator                        | <i>arcA</i> | < | > | <i>yjJY</i> | predicted protein                  | 0.42 |

Supplemental Table S1B

RNA Polymerase RpoD Holoenzyme-Binding Sites on the *E. coli* Genome (Cut-off level, 2.0)

| Position | Function                                 | Left Gene           | D | RpoD | D | Right Gene          | Function                                             | Level |
|----------|------------------------------------------|---------------------|---|------|---|---------------------|------------------------------------------------------|-------|
| 19830    | <i>InsAB</i> transposase                 | <i>insAB-1</i>      | < | <    | < | <i>insB-1</i>       |                                                      | 0.17  |
| 127644   |                                          | <i>aceF</i>         | > | >    | > | <i>lpd</i>          | lipoamide dehydrogenase                              | 0.04  |
| 164658   |                                          | <i>hrpB</i>         | > | >    | > | <i>mrcB</i>         | fused glycosyl transferase and transpeptidase        | 0.05  |
| 167354   |                                          | <i>mrcB</i>         | > | >    | > | <i>fhuA</i>         | colicin M receptor outer membrane protein            | 0.46  |
| 176542   |                                          | <i>clcA</i>         | > | >    | > | <i>erpA</i>         | essential respiratory protein A                      | 0.39  |
| 184258   | conserved protein                        | <i>yaeH</i>         | < | <    | < | <i>yaeI</i>         |                                                      | 0.06  |
| 268354   | CP4-6 prophage GTP-binding protein       | <i>ykfA</i>         | < | <    | < | <i>perR</i>         |                                                      | 0.06  |
| 289640   | ornithine carbamoyltransferase 2         | <i>argF</i>         | < | <    | < | <i>insAB-3</i>      |                                                      | 0.16  |
| 292358   | CP4-6 prophage conserved protein         | <i>yagK</i>         | < | <    | < | <i>yagL</i>         |                                                      | 0.93  |
| 331130   |                                          | <i>betT</i>         | > | >    | > | <i>yahA</i>         | c-di-GMP phosphodiesterase                           | 0.05  |
| 379186   | transcription regulator                  | <b><i>frmR</i></b>  | < | <    | < | <i>yaiO</i>         |                                                      | 0.28  |
| 447242   | cytochrome <i>bo</i> terminal oxidase    | <i>cyoD</i>         | < | <    | < | <i>cyoC</i>         |                                                      | 0.12  |
| 454246   |                                          | <i>bolA</i>         | > | >    | > | <i>tig</i>          | cell division trigger factor                         | 0.10  |
| 455840   |                                          | <i>tig</i>          | > | >    | > | <i>clpP</i>         | ATP-dependent serine protease                        | 0.08  |
| 467530   |                                          | <i>cof</i>          | > | >    | > | <b><i>ybaO</i></b>  | transcription regulator                              | 0.28  |
| 477932   | conserved inner membrane protein         | <i>ylaB</i>         | < | <    | < | <i>ylaC</i>         |                                                      | 0.06  |
| 478570   | predicted inner membrane protein         | <i>ylaC</i>         | < | <    | < | <i>maa</i>          |                                                      | 0.05  |
| 479130   | maltose O-acetyltransferase              | <i>maa</i>          | < | <    | < | <i>hha</i>          |                                                      | 0.04  |
| 522060   |                                          | <i>ybbP</i>         | > | >    | > | <i>rhsD</i>         | <i>rhs</i> element protein                           | 0.06  |
| 522472   |                                          | <i>ybbP</i>         | > | >    | > | <i>rhsD</i>         | <i>rhs</i> element protein                           | 0.19  |
| 570042   |                                          | <i>ybcK</i>         | > | >    | > | <i>ybcL</i>         | DLP12 prophage kinase inhibitor                      | 0.05  |
| 585168   | outer membrane protease VII              | <i>ompT</i>         | < | <    | < | <i>envY</i>         |                                                      | 0.19  |
| 592452   | phage N4 receptor inner membrane protein | <i>nfrB</i>         | < | <    | < | <i>cusS</i>         |                                                      | 0.03  |
| 604658   | dihydropteridine reductase monomer       | <i>nfsB</i>         | < | <    | < | <i>ybdF</i>         |                                                      | 0.05  |
| 629042   |                                          | <i>entH</i>         | > | >    | > | <i>cstA</i>         | carbon starvation peptide transporter                | 0.05  |
| 656450   |                                          | <i>pagP</i>         | > | >    | > | <i>cspE</i>         | transcription antiterminator and RNA stability regul | 0.09  |
| 659648   | lipoate synthase monomer                 | <i>lipA</i>         | < | <    | < | <i>ybeF</i>         |                                                      | 0.07  |
| 660756   | transcription regulator                  | <b><i>ybeF</i></b>  | < | <    | < | <i>lipB</i>         |                                                      | 0.07  |
| 710068   | RyhB-regulated <i>fur</i> leader peptide | <i>uof</i>          | < | <    | < | <i>fldA</i>         |                                                      | 0.16  |
| 710768   | flavodoxin 1                             | <i>fldA</i>         | < | <    | < | <i>ybfE</i>         |                                                      | 0.16  |
| 711270   | LexA-regulated protein                   | <i>ybfE</i>         | < | <    | < | <i>ybfF</i>         |                                                      | 0.07  |
| 733362   |                                          | <i>ybfB</i>         | > | >    | > | <i>ybfO</i>         | Rhs-like conserved protein                           | 0.03  |
| 752436   | fimbrial-like adhesin protein            | <i>ybgD</i>         | < | <    | < | <i>gltA</i>         |                                                      | 0.07  |
| 770038   |                                          | <i>mngB</i>         | > | >    | > | <i>cydA</i>         | cytochrome bd-I terminal oxidase                     | 0.13  |
| 770668   |                                          | <i>mngB</i>         | > | >    | > | <i>cydA</i>         | cytochrome bd-I terminal oxidase                     | 0.15  |
| 786938   | phosphoglyceromutase 1 monomer           | <i>gpmA</i>         | < | <    | < | <i>galM</i>         |                                                      | 0.38  |
| 791446   | UDP-glucose 4-epimerase monomer          | <i>galE</i>         | < | <    | < | <i>modF</i>         |                                                      | 0.12  |
| 837732   | conserved protein                        | <i>ybil</i>         | < | <    | < | <i>ybiX</i>         |                                                      | 0.04  |
| 891170   |                                          | <i>nfsA</i>         | > | >    | > | <i>rimK</i>         | ribosomal protein S6 modification protein            | 0.05  |
| 899960   | arginine binding periplasmic protein     | <i>artJ</i>         | < | <    | < | <i>artM</i>         |                                                      | 0.04  |
| 903064   | arginine transporter                     | <i>artP</i>         | < | <    | < | <i>ybjP</i>         |                                                      | 0.10  |
| 914352   | predicted transporter                    | <i>ybjE</i>         | < | <    | < | <i>aqpZ</i>         |                                                      | 0.10  |
| 938542   |                                          | <i>rarA</i>         | > | >    | > | <i>serS</i>         | seryl-tRNA synthetase                                | 0.05  |
| 959450   |                                          | <i>aroA</i>         | > | >    | > | <i>ycaL</i>         | putative heat shock protein                          | 0.05  |
| 1019652  | outer membrane protein 3a                | <i>ompA</i>         | < | <    | < | <i>sulA</i>         |                                                      | 0.03  |
| 1043864  | phosphotyrosine-protein phosphatase      | <i>etp</i>          | < | <    | < | <i>gfcE</i>         |                                                      | 0.03  |
| 1084156  |                                          | <i>efeB</i>         | > | >    | > | <i>phoH</i>         | phosphate starvation-induced ATP-binding protein     | 0.19  |
| 1120230  | biofilm formation regulator              | <i>bssS</i>         | < | <    | < | <i>dinI</i>         |                                                      | 0.63  |
| 1133766  |                                          | <i>flgF</i>         | > | >    | > | <i>flgG</i>         | flagellar basal-body rod protein                     | 0.03  |
| 1150750  |                                          | <i>fabG</i>         | > | >    | > | <i>acpP</i>         | apo-[acyl carrier protein]                           | 0.09  |
| 1152532  |                                          | <i>fabF</i>         | > | >    | > | <i>pabC</i>         | para-aminobenzoate synthase                          | 0.03  |
| 1165242  |                                          | <i>ycfP</i>         | > | >    | > | <i>ndh</i>          | NADH:ubiquinone oxidoreductase II                    | 0.20  |
| 1173266  | transcription-repair coupling factor     | <i>mfd</i>          | < | <    | < | <i>ycfT</i>         |                                                      | 0.05  |
| 1195654  |                                          | <i>icd</i>          | > | >    | > | <b><i>C0293</i></b> | <i>C0293</i> small RNA                               | 0.11  |
| 1209454  |                                          | <i>pinE</i>         | > | >    | > | <i>mcrA</i>         | restriction of DNA at 5-methylcytosine residues      | 0.08  |
| 1213264  | transcription regulator                  | <i>ycgE</i>         | < | <    | < | <i>ycgF</i>         |                                                      | 0.23  |
| 1216544  |                                          | <i>yngC</i>         | > | >    | > | <i>ycgG</i>         | conserved inner membrane protein                     | 0.04  |
| 1218568  |                                          | <i>yngF</i>         | > | >    | > | <i>ycgH</i>         | autotransporter                                      | 0.06  |
| 1218960  |                                          | <i>yngF</i>         | > | >    | > | <i>ycgH</i>         | autotransporter                                      | 0.15  |
| 1219948  |                                          | <i>yngF</i>         | > | >    | > | <i>ycgH</i>         | autotransporter                                      | 0.04  |
| 1229964  |                                          | <b><i>C0299</i></b> | > | >    | > | <i>umuD</i>         | mutagenesis and error-prone repair protein           | 0.05  |
| 1257172  | putative GTP-binding protein             | <i>yhfF</i>         | < | <    | < | <i>pth</i>          |                                                      | 0.07  |

|         |                                            |             |   |   |               |                                               |      |
|---------|--------------------------------------------|-------------|---|---|---------------|-----------------------------------------------|------|
| 1285738 |                                            | <i>narI</i> | > | > | <i>ychS</i>   | predicted protein                             | 0.09 |
| 1298670 |                                            | <i>ychE</i> | > | > | <i>oppA</i>   | oligopeptide ABC transporter                  | 0.25 |
| 1320956 | anthranilate synthase                      | <i>trpE</i> | < | < | <i>trpL</i>   |                                               | 0.05 |
| 1322756 |                                            | <i>yciO</i> | > | > | <i>yciQ</i>   | predicted inner membrane protein              | 0.04 |
| 1331866 |                                            | <i>topA</i> | > | > | <i>cysB</i>   | transcriptional regulator                     | 0.13 |
| 1338150 |                                            | <i>pgpB</i> | > | > | <i>yciS</i>   | conserved inner membrane protein              | 0.06 |
| 1341546 | osmotically inducible lipoprotein          | <i>osmB</i> | < | < | <i>yciT</i>   |                                               | 0.09 |
| 1349156 | enoyl-[acyl-carrier-protein] reductase     | <i>fabI</i> | < | < | <i>ycjD</i>   |                                               | 0.42 |
| 1349842 | conserved protein                          | <i>ycjD</i> | < | < | <i>sapF</i>   |                                               | 0.04 |
| 1355134 | ABC peptide transporter                    | <i>sapA</i> | < | < | <i>ymjA</i>   |                                               | 0.07 |
| 1432638 | Rac prophage transcription regulator       | <i>ynaE</i> | < | < | <i>uspF</i>   |                                               | 0.20 |
| 1453172 |                                            | <i>paaB</i> | > | > | <i>paaC</i>   | phenylacetyl-CoA monooxygenase                | 0.04 |
| 1500460 |                                            | <i>tehB</i> | > | > | <i>ydCL</i>   | predicted lipoprotein                         | 0.06 |
| 1525368 |                                            | <i>yncH</i> | > | > | <i>rhsE</i>   | RhsE protein                                  | 0.05 |
| 1529370 |                                            | <i>yncl</i> | > | > | <i>yncM</i>   | predicted protein                             | 0.06 |
| 1584860 | acid resistance protein                    | <i>ydeP</i> | < | < | <i>ydeQ</i>   |                                               | 0.05 |
| 1590548 | HipAB toxin                                | <i>hipB</i> | < | < | <i>ydeU</i>   |                                               | 0.19 |
| 1596530 | predicted lipoprotein                      | <i>ydeK</i> | < | < | <i>lsrK</i>   |                                               | 0.05 |
| 1639234 | Qin prophage S lysis protein               | <i>essQ</i> | < | < | <i>cspB</i>   |                                               | 0.07 |
| 1647456 |                                            | <i>dicF</i> | > | > | <i>dicB</i>   | Qin prophage cell division inhibition protein | 0.04 |
| 1651956 | Zn-depd and NAD(P)-binding oxidoreductase, | <i>rspB</i> | < | < | <i>rspA</i>   |                                               | 0.12 |
| 1653236 | mannonate/altronate dehydratase            | <i>rspA</i> | < | < | <i>ynfA</i>   |                                               | 0.04 |
| 1669136 |                                            | <i>ynfM</i> | > | > | <i>asr</i>    | acid shock protein                            | 0.03 |
| 1682244 |                                            | <i>rstB</i> | > | > | <i>tus</i>    | replication inhibition Ter-site protein       | 0.18 |
| 1733430 |                                            | <i>ydH</i>  | > | > | <i>sodB</i>   | superoxide dismutase (Fe)                     | 0.05 |
| 1739130 |                                            | <i>ydH</i>  | > | > | <i>cfa</i>    | cyclopropane fatty acyl phospholipid synthase | 0.24 |
| 1762758 | Fe-S cluster scaffold protein              | <i>sufA</i> | < | < | <i>rydB</i>   |                                               | 0.03 |
| 1763230 | predicted protein                          | <i>ydiH</i> | < | < | <i>ydiI</i>   |                                               | 0.14 |
| 1768530 |                                            | <i>rprA</i> | > | > | <i>ydiL</i>   | conserved protein                             | 0.09 |
| 1787570 |                                            | <i>aroH</i> | > | > | <i>ydiE</i>   | conserved protein                             | 0.20 |
| 1808170 |                                            | <i>yniC</i> | > | > | <i>ydjM</i>   | LexA-regulated inner membrane protein         | 0.29 |
| 1808932 |                                            | <i>ydjM</i> | > | > | <i>ydjN</i>   | predicted transporter                         | 0.09 |
| 1811360 | predicted protein                          | <i>ydjO</i> | < | < | <i>cedA</i>   |                                               | 0.25 |
| 1821530 |                                            | <i>nadE</i> | > | > | <i>cho</i>    | excision repair endonuclease                  | 0.09 |
| 1823166 | CpsA-related protein                       | <i>ves</i>  | < | < | <i>spy</i>    |                                               | 0.03 |
| 1852958 | predicted transcriptional regulator        | <i>ydjF</i> | < | < | <i>ydjG</i>   |                                               | 0.13 |
| 1870038 |                                            | <i>yeal</i> | > | > | <i>yeaJ</i>   | predicted diguanylate cyclase                 | 0.04 |
| 1877272 | conserved inner membrane protein           | <i>yeaQ</i> | < | < | <i>yoaG</i>   |                                               | 0.05 |
| 1887966 | fatty acyl-CoA synthetase                  | <i>fadD</i> | < | < | <i>yeaY</i>   |                                               | 0.05 |
| 1905768 | stress response small protein              | <i>yobF</i> | < | < | <i>yebO</i>   |                                               | 0.13 |
| 1906230 | stress response small protein              | <i>yobF</i> | < | < | <i>yebO</i>   |                                               | 0.07 |
| 1912840 | tail-specific protease                     | <i>prc</i>  | < | < | <i>proQ</i>   |                                               | 0.04 |
| 1923454 |                                            | <i>holE</i> | > | > | <i>yobB</i>   | conserved protein                             | 0.05 |
| 1927864 | conserved inner membrane protein           | <i>yebE</i> | < | < | <i>yebF</i>   |                                               | 0.31 |
| 1932868 | phosphogluconate dehydratase               | <i>edd</i>  | < | < | <i>zwf</i>    |                                               | 0.11 |
| 1956436 | trimethylamine N-oxide reductase III       | <i>torY</i> | < | < | <i>cutC</i>   |                                               | 0.10 |
| 1990832 | phosphatidylglycerophosphate synthase      | <i>pgsA</i> | < | < | <i>uvrC</i>   |                                               | 0.05 |
| 1994970 | transcription regulator                    | <i>sdiA</i> | < | < | <i>yecC</i>   |                                               | 0.10 |
| 1999044 | regulator of sigma-S activity              | <i>fliZ</i> | < | < | <i>fliA</i>   |                                               | 0.04 |
| 2039332 |                                            | <i>yedZ</i> | > | > | <i>zinT</i>   | cadmium-induced cadmium binding protein       | 0.26 |
| 2054646 |                                            | <i>amn</i>  | > | > | <i>yeeN</i>   | conserved protein                             | 0.20 |
| 2063954 | cobinamide kinase                          | <i>cobU</i> | < | < | <i>insH-6</i> |                                               | 0.18 |
| 2069334 |                                            | <i>yeeP</i> | > | > | <i>lsrC</i>   | lsrC small RNA                                | 0.27 |
| 2077562 | conserved protein                          | <i>yeeX</i> | < | < | <i>yeeA</i>   |                                               | 0.12 |
| 2111266 | dTDP-glucose 4,6-dehydratase               | <i>rfbB</i> | < | < | <i>galF</i>   |                                               | 0.08 |
| 2163042 |                                            | <i>baeR</i> | > | > | <i>yegP</i>   | predicted protein                             | 0.07 |
| 2165566 | P2 prophage transcription regulator        | <i>ogrK</i> | < | < | <i>yegZ</i>   |                                               | 0.19 |
| 2181734 | predicted hydrolase                        | <i>yegX</i> | < | < | <i>thiD</i>   |                                               | 0.05 |
| 2210264 | conserved protein                          | <i>yehS</i> | < | < | <i>yehT</i>   |                                               | 0.14 |
| 2222972 | penicillin-binding protein 7               | <i>pbpG</i> | < | < | <i>yohC</i>   |                                               | 0.07 |
| 2276340 | predicted protein                          | <i>yejG</i> | < | < | <i>bcr</i>    |                                               | 0.68 |
| 2284170 |                                            | <i>yejM</i> | > | > | <i>proL</i>   | Pro-tRNA                                      | 0.14 |
| 2304772 | malate:quinone oxidoreductase              | <i>mqr</i>  | < | < | <i>yojI</i>   |                                               | 0.11 |
| 2342332 | adhesin                                    | <i>yfaL</i> | < | < | <i>ypaB</i>   |                                               | 0.05 |
| 2371636 | polymyxin B resistance protein             | <i>pmrD</i> | < | < | <i>menE</i>   |                                               | 0.05 |
| 2403250 | NADH:ubiquinone oxidoreductase             | <i>nuoA</i> | < | < | <i>lrhA</i>   |                                               | 0.03 |
| 2403752 | NADH:ubiquinone oxidoreductase             | <i>nuoA</i> | < | < | <i>lrhA</i>   |                                               | 0.04 |

|         |                                                 |             |   |   |             |                                          |      |
|---------|-------------------------------------------------|-------------|---|---|-------------|------------------------------------------|------|
| 2424846 | histidine/lysine/arginine/ornithine transporter | <i>hisJ</i> | < | < | <i>argT</i> |                                          | 0.08 |
| 2454170 | predicted fimbrial-like adhesin protein         | <i>yfcV</i> | < | < | <i>sixA</i> |                                          | 0.11 |
| 2488236 | YfdV AEC transporter                            | <i>yfdV</i> | < | < | <i>oxc</i>  |                                          | 0.04 |
| 2491738 | formyl-CoA transferase monomer                  | <i>frc</i>  | < | < | <i>yfdX</i> |                                          | 0.03 |
| 2530446 |                                                 | <i>cysZ</i> | > | > | <i>cysK</i> | cysteine synthase A                      | 0.04 |
| 2561330 |                                                 | <i>yfiP</i> | > | > | <i>yfiQ</i> | CPZ-55 prophage protein                  | 0.07 |
| 2562468 |                                                 | <i>yfiR</i> | > | > | <i>yfiS</i> | CPZ-55 prophage protein                  | 0.07 |
| 2599140 |                                                 | <i>bcp</i>  | > | > | <i>hyfA</i> | hydrogenase 4                            | 0.31 |
| 2618272 | UraA uracil NCS2 transporter                    | <i>uraA</i> | < | < | <i>upp</i>  |                                          | 0.03 |
| 2654368 | aminopeptidase B                                | <i>pepB</i> | < | < | <i>iscX</i> |                                          | 0.03 |
| 2689364 | GlmY small RNA                                  | <i>glmY</i> | < | < | <i>purL</i> |                                          | 0.23 |
| 2698136 | RyfB small RNA                                  | <i>ryfB</i> | < | < | <i>shoB</i> |                                          | 0.08 |
| 2723936 | alpha-ketoglutarate MFS transporter             | <i>kgtP</i> | < | < | <i>rrfG</i> |                                          | 0.27 |
| 2749768 |                                                 | <i>nadK</i> | > | > | <i>recN</i> | recombination and DNA repair protein     | 0.22 |
| 2753630 |                                                 | <i>smpB</i> | > | > | <i>ssrA</i> | tmRNA, 10Sa RNA                          | 1.00 |
| 2754072 |                                                 | <i>ssrA</i> | > | > | <i>intA</i> | CP4-57 prophage integrase                | 0.03 |
| 2763458 | CP4-57 prophage protein                         | <i>yfjL</i> | < | < | <i>yfjM</i> |                                          | 0.34 |
| 2765650 |                                                 | <i>yfjO</i> | > | > | <i>yfjP</i> | CP4-57 GTP-binding protein               | 0.04 |
| 2773166 |                                                 | <i>yfjW</i> | > | > | <i>yfjX</i> | CP4-57 antirestriction protein           | 0.35 |
| 2805072 |                                                 | <i>proW</i> | > | > | <i>proX</i> | glycine betaine transporter              | 0.07 |
| 2807634 |                                                 | <i>ygaY</i> | > | > | <i>ygaZ</i> | YgaZ L-valine LIV-E exporter             | 0.19 |
| 2826636 |                                                 | <i>srlD</i> | > | > | <i>gutM</i> | transcription regulator                  | 0.07 |
| 2845448 | hydrogenase 3t                                  | <i>hycD</i> | < | < | <i>hycC</i> |                                          | 0.09 |
| 2857732 |                                                 | <i>mutS</i> | > | > | <i>pphB</i> | protein Tyr-phosphatase                  | 0.20 |
| 2877772 | predicted integrase                             | <i>cas1</i> | < | < | <i>casE</i> |                                          | 0.04 |
| 2909368 | MazE antitoxin                                  | <i>chpR</i> | < | < | <i>relA</i> |                                          | 0.50 |
| 2967172 | RNA pyrophosphohydrolase                        | <i>rppH</i> | < | < | <i>ygdT</i> |                                          | 0.46 |
| 2982230 | predicted 5-keto 4-deoxyuronate isomerase       | <i>kdul</i> | < | < | <i>yqeF</i> |                                          | 0.18 |
| 2989046 |                                                 | <i>ygeF</i> | > | > | <i>ygeG</i> | predicted chaperone                      | 0.05 |
| 2991858 |                                                 | <i>ygeL</i> | > | > | <i>pbl</i>  | predicted peptidoglycan-binding enzyme   | 0.04 |
| 3044072 | predicted NAD(P)-binding oxidoreductase         | <i>ygfF</i> | < | < | <i>gcvP</i> |                                          | 0.04 |
| 3054032 |                                                 | <i>zapA</i> | > | > | <i>ssrS</i> | 6S RNA                                   | 0.12 |
| 3054846 |                                                 | <i>ygfA</i> | > | > | <i>sibC</i> | SibC small RNA                           | 0.09 |
| 3071934 | erythrose 4-phosphate dehydrogenase             | <i>epd</i>  | < | < | <i>yggC</i> |                                          | 0.05 |
| 3112370 | prepilin peptidase                              | <i>pppA</i> | < | < | <i>yghJ</i> |                                          | 0.03 |
| 3151570 |                                                 | <i>metC</i> | > | > | <i>yghB</i> | conserved inner membrane protein         | 0.11 |
| 3166762 | MqsR toxin mRNA interferase                     | <i>mqsR</i> | < | < | <i>ygiV</i> |                                          | 0.24 |
| 3167230 | transcription regulator                         | <i>ygiV</i> | < | < | <i>ygiW</i> |                                          | 0.04 |
| 3174034 | esterase                                        | <i>yqiA</i> | < | < | <i>cpdA</i> |                                          | 0.07 |
| 3183170 |                                                 | <i>yqiC</i> | > | > | <i>ygiL</i> | predicted fimbrial-like adhesin protein  | 0.05 |
| 3205972 |                                                 | <i>ttdB</i> | > | > | <i>ttdT</i> | TtdT tartrate/succinate DASS transporter | 0.04 |
| 3220450 |                                                 | <i>ebgR</i> | > | > | <i>ebgA</i> | evolved beta-D-galactosidase             | 0.05 |
| 3226938 |                                                 | <i>ygjJ</i> | > | > | <i>ygjK</i> | glycoside hydrolase                      | 0.07 |
| 3237654 |                                                 | <i>alx</i>  | > | > | <i>sstT</i> | SstT DAACS transporter                   | 0.14 |
| 3244640 |                                                 | <i>exuT</i> | > | > | <i>exuR</i> | transcription regulator                  | 0.12 |
| 3245772 |                                                 | <i>exuR</i> | > | > | <i>yqjA</i> | conserved inner membrane protein         | 0.22 |
| 3265634 |                                                 | <i>tdcR</i> | > | > | <i>yhaB</i> | predicted protein                        | 0.06 |
| 3270768 | tartronate semialdehyde reductase               | <i>garR</i> | < | < | <i>garL</i> |                                          | 0.03 |
| 3332864 |                                                 | <i>ispB</i> | > | > | <i>sfsB</i> | transcription regulator                  | 0.16 |
| 3375742 | stringent starvation protein                    | <i>sspA</i> | < | < | <i>rpsI</i> |                                          | 0.59 |
| 3383544 |                                                 | <i>argR</i> | > | > | <i>yhcN</i> | stress-induced protein                   | 0.13 |
| 3408230 |                                                 | <i>prmA</i> | > | > | <i>dusB</i> | tRNA dihydrouridine synthase             | 0.14 |
| 3465030 | bacterioferritin-associated ferredoxin          | <i>bfd</i>  | < | < | <i>chiA</i> |                                          | 0.07 |
| 3474542 | transcription regulator                         | <i>yheO</i> | < | < | <i>fkpA</i> |                                          | 0.05 |
| 3481234 |                                                 | <i>yheS</i> | > | > | <i>yheT</i> | predicted hydrolase                      | 0.07 |
| 3497644 |                                                 | <i>yhfL</i> | > | > | <i>friA</i> | predicted fructoselysine transporter     | 0.12 |
| 3538170 |                                                 | <i>yhgF</i> | > | > | <i>feoA</i> | ferrous iron transport protein A         | 0.05 |
| 3576742 | transcription regulator                         | <i>gntR</i> | < | < | <i>yhhW</i> |                                          | 0.39 |
| 3598870 | RNA polymerase, sigma 32 (sigma H) factor       | <i>rpoH</i> | < | < | <i>ftsX</i> |                                          | 0.03 |
| 3628772 | predicted HlyD family secretion protein         | <i>yhil</i> | < | < | <i>yhiJ</i> |                                          | 0.51 |
| 3630862 | predicted protein                               | <i>yhiJ</i> | < | < | <i>yhiK</i> |                                          | 0.45 |
| 3648872 |                                                 | <i>arsC</i> | > | > | <i>yhiS</i> | predicted protein                        | 0.59 |
| 3654348 | acid stress chaperone                           | <i>hdeB</i> | < | < | <i>hdeA</i> |                                          | 0.06 |
| 3702772 | dipeptide ABC transporter                       | <i>dppC</i> | < | < | <i>dppB</i> |                                          | 0.05 |
| 3741746 |                                                 | <i>yiaK</i> | > | > | <i>yiaL</i> | conserved protein                        | 0.04 |
| 3752670 | conserved inner membrane protein                | <i>yiaW</i> | < | < | <i>aldB</i> |                                          | 0.14 |
| 3794944 |                                                 | <i>waaC</i> | > | > | <i>rfaL</i> | O-antigen ligase                         | 0.17 |

|         |                                        |               |   |   |               |                                             |      |
|---------|----------------------------------------|---------------|---|---|---------------|---------------------------------------------|------|
| 3815652 |                                        | <i>yicC</i>   | > | > | <i>dinD</i>   | DNA-damage-inducible protein                | 0.08 |
| 3906432 | phosphate ABC transporter              | <i>pstB</i>   | < | < | <i>pstA</i>   |                                             | 0.04 |
| 3957944 | peptidyl-prolyl cis-trans isomerase C  | <i>ppiC</i>   | < | < | <i>yifO</i>   |                                             | 0.28 |
| 4047838 |                                        | <i>polA</i>   | > | > | <i>spf</i>    | Spot42 RNA                                  | 0.04 |
| 4054334 | NtrB sensory kinase                    | <i>glnL</i>   | < | < | <i>glnA</i>   |                                             | 0.10 |
| 4058260 |                                        | <i>typA</i>   | > | > | <i>yihL</i>   | putative transcriptional regulator          | 0.04 |
| 4105564 |                                        | <i>fieF</i>   | > | > | <i>pfkA</i>   | 6-phosphofructokinase-1 monomer             | 0.04 |
| 4117434 | ribonuclease E inhibitor protein       | <i>rraA</i>   | < | < | <i>menA</i>   |                                             | 0.12 |
| 4179270 |                                        | <i>rplL</i>   | > | > | <i>rpoB</i>   | RNA polymerase, beta-subunit                | 0.04 |
| 4188758 | SroH small RNA                         | <i>sroH</i>   | < | < | <i>thiH</i>   |                                             | 0.04 |
| 4281230 | conserved protein                      | <i>yjcF</i>   | < | < | <i>actP</i>   |                                             | 0.32 |
| 4292136 |                                        | <i>nrfG</i>   | > | > | <i>glpP</i>   | GitP glutamate/aspartate DAACS transporter  | 0.05 |
| 4295170 | conserved protein                      | <i>yjcO</i>   | < | < | <i>fdhF</i>   |                                             | 0.05 |
| 4323832 | conserved protein                      | <i>yjdN</i>   | < | < | <i>yjdM</i>   |                                             | 0.03 |
| 4338634 | arginine decarboxylase                 | <i>adiA</i>   | < | < | <i>melR</i>   |                                             | 0.16 |
| 4358254 | CadB cadaverine/lysine APC exchanger   | <i>cadB</i>   | < | < | <i>cadC</i>   |                                             | 0.06 |
| 4364770 | DcuA dicarboxylate Dcu transporter     | <i>dcuA</i>   | < | < | <i>aspA</i>   |                                             | 0.06 |
| 4372468 | predicted protein                      | <i>yjeJ</i>   | < | < | <i>yjeK</i>   |                                             | 0.16 |
| 4374836 |                                        | <i>ecnB</i>   | > | > | <i>sugE</i>   | SugE SMR transporter                        | 0.13 |
| 4402644 |                                        | <i>yjeT</i>   | > | > | <i>purA</i>   | adenylosuccinate synthetase                 | 0.05 |
| 4408030 |                                        | <i>rlmB</i>   | > | > | <i>yjfl</i>   | conserved protein                           | 0.06 |
| 4424154 |                                        | <i>rpsR</i>   | > | > | <i>rplI</i>   | 50S ribosomal subunit protein L9            | 0.07 |
| 4427854 |                                        | <i>fkfB</i>   | > | > | <i>cycA</i>   | CycA serine/alanine/glycine APC transporter | 0.03 |
| 4460968 | ribonucleoside-triphosphate reductase  | <i>nrdD</i>   | < | < | <i>treC</i>   |                                             | 0.10 |
| 4498432 | KpLE2 predicted protein                | <i>yjgX_2</i> | < | < | <i>yjgX_1</i> |                                             | 0.23 |
| 4518430 | KpLE2 prophage transcription regulator | <i>yjhU</i>   | < | < | <i>yjhF</i>   |                                             | 0.07 |
| 4523966 | KpLE2 prophage transcription regulator | <i>yjhl</i>   | < | < | <i>sgcR</i>   |                                             | 0.05 |
| 4530330 | KpLE2 predicted endoglucanase          | <i>sgcX</i>   | < | < | <i>yjhP</i>   |                                             | 0.08 |
| 4539934 |                                        | <i>fimB</i>   | > | > | <i>fimE</i>   | regulator for fimA                          | 0.08 |
| 4540968 |                                        | <i>fimE</i>   | > | > | <i>fimA</i>   | major type 1 subunit fimbrin (pilin)        | 0.04 |
| 4552370 |                                        | <i>uxuB</i>   | > | > | <i>uxuR</i>   | transcription regulator                     | 0.23 |
| 4557562 | isoaspartyl dipeptidase                | <i>iadA</i>   | < | < | <i>yjiG</i>   |                                             | 0.06 |
| 4561866 | conserved protein                      | <i>yjiK</i>   | < | < | <i>yjiL</i>   |                                             | 0.05 |
| 4570370 |                                        | <i>yjiS</i>   | > | > | <i>yjiT</i>   | conserved protein                           | 0.03 |
| 4577430 | 5-methylcytosine restriction system    | <i>mcrB</i>   | < | < | <i>symE</i>   |                                             | 0.52 |
| 4617638 |                                        | <i>deoA</i>   | > | > | <i>deoB</i>   | phosphopentomutase                          | 0.04 |
| 4619734 |                                        | <i>deoD</i>   | > | > | <i>yjiJ</i>   | transcription regulator                     | 0.05 |
