# Supplementary material for: The Whole Set of Constitutive Promoters Recognized by RNA Polymerase RpoD Holoenzyme of Escherichia coli
Source: PubMed Central journal article supplement (PMC3946193; doi:10.1371/journal.pone.0090447), 2014-03-06
Supplement: pone.0090447.s002.pdf [file pone.0090447.s002.pdf]

**Supplemental Table S2A**  
**Constitutive Promoters within Type-A Spacers**

| Map   | Operon                                                                              | Left Gene    | D  | P | HNS | P | D  | Right Gene   | Operon                                   | Map   |
|-------|-------------------------------------------------------------------------------------|--------------|----|---|-----|---|----|--------------|------------------------------------------|-------|
| 0.87  | <i>cai</i> TABCDE                                                                   | <i>cai</i> T | <  |   | HNS |   | >  | <i>fix</i> A | <i>fix</i> ABCX                          | 0.91  |
| 2.43  | <i>coa</i> ED                                                                       | <i>coa</i> E | <  |   |     |   | >  | <i>gua</i> C | <i>gua</i> C                             | 2.45  |
| 2.99  | <i>gcd</i>                                                                          | <i>gcd</i>   | <  |   |     |   | >  | <i>hpt</i>   | <i>hpt</i>                               | 3.05  |
| 3.06  | <i>can</i>                                                                          | <i>can</i>   | << |   |     |   | >> | <i>yad</i> G | <i>yad</i> GH                            | 3.08  |
| 5.19  | <i>fad</i> E                                                                        | <i>fad</i> E | <  |   |     |   | >  | <i>lpc</i> A | <i>lpc</i> A                             | 5.25  |
| 5.31  | <i>din</i> J- <i>yaf</i> Q                                                          | <i>din</i> J | <  |   |     |   | >  | <i>yaf</i> L | <i>yaf</i> L                             | 5.32  |
| 5.57  | <i>pho</i> E                                                                        | <i>pho</i> E | <  |   | HNS |   | >  | <i>pro</i> B | <i>pro</i> BA                            | 5.60  |
| 6.04  | <i>yag</i> AB- <i>ykg</i> N                                                         | <i>yag</i> A | <  |   |     |   | >  | <i>yag</i> E | <i>yag</i> EF                            | 6.07  |
| 6.68  | <i>mat</i> A                                                                        | <i>mat</i> A | <  |   | HNS |   | >  | <i>ykg</i> L | <i>ykg</i> L                             | 6.71  |
| 7.07  | <i>bet</i> lBA                                                                      | <i>bet</i> l | <  |   | HNS |   | >  | <i>bet</i> T | <i>bet</i> T                             | 7.08  |
| 8.26  | <i>yai</i> S                                                                        | <i>yai</i> S | <  |   | HNS |   | >  | <i>tau</i> A | <i>tau</i> ABCD                          | 8.29  |
| 12.14 | <i>fim</i> Z                                                                        | <i>fim</i> Z | << |   |     |   | >> | <i>arg</i> U | <i>arg</i> U                             | 12.15 |
| 13.05 | <i>ybd</i> K                                                                        | <i>ybd</i> K | << |   |     |   | >  | <i>hok</i> E | <i>hok</i> E                             | 13.08 |
| 13.14 | <i>fep</i> A                                                                        | <i>fep</i> A | <  |   | HNS |   | >  | <i>fes</i>   | <i>fes</i> - <i>ybd</i> Z- <i>ent</i> FE | 13.19 |
| 13.37 | <i>fep</i> DGC                                                                      | <i>fep</i> D | << |   | HNS |   | >> | <i>ent</i> S | <i>ent</i> S                             | 13.40 |
| 13.42 | <i>fep</i> B                                                                        | <i>fep</i> B | <  |   |     |   | >  | <i>ent</i> C | <i>ent</i> CEBAH                         | 13.45 |
| 13.73 | <i>dsb</i> G                                                                        | <i>dsb</i> G | <  |   |     |   | >  | <i>ahp</i> C | <i>ahp</i> CF                            | 13.75 |
| 15.13 | <i>nag</i> B                                                                        | <i>nag</i> B | <  |   |     |   | >  | <i>nag</i> E | <i>nag</i> E                             | 15.16 |
| 16.22 | <i>glt</i> A                                                                        | <i>glt</i> A | <  |   | HNS |   | >  | <i>sdh</i> C | <i>sdh</i> CDAB                          | 16.26 |
| 16.46 | <i>mng</i> R                                                                        | <i>mng</i> R | << |   | HNS |   | >> | <i>mng</i> A | <i>mng</i> AB                            | 16.49 |
| 17.51 | <i>ybh</i> U                                                                        | <i>ybh</i> U | << |   |     |   | >> | <i>uvr</i> B | <i>uvr</i> B                             | 17.52 |
| 18.29 | <i>rht</i> A                                                                        | <i>rht</i> A | <  |   |     |   | >  | <i>omp</i> X | <i>omp</i> X                             | 18.31 |
| 18.37 | <i>ryb</i> A                                                                        | <i>ryb</i> A | << |   |     |   | >> | <i>mnt</i> R | <i>mnt</i> R- <i>ybi</i> R               | 18.37 |
| 19.13 | <i>ybj</i> L                                                                        | <i>ybj</i> L | <  |   | HNS |   | >  | <i>ybj</i> M | <i>ybj</i> M                             | 19.17 |
| 21.98 | <i>sul</i> A                                                                        | <i>sul</i> A | <  |   | HNS |   | >  | <i>sxy</i>   | <i>sxy</i>                               | 21.99 |
| 23.75 | <i>csg</i> DEFG                                                                     | <i>csg</i> D | << |   | HNS |   | >  | <i>csg</i> B | <i>csg</i> BAC                           | 23.78 |
| 23.86 | <i>mbo</i> C                                                                        | <i>mbo</i> C | <  |   | HNS |   | >  | <i>mbo</i> G | <i>mbo</i> GH                            | 23.89 |
| 24.03 | <i>lpx</i> L                                                                        | <i>lpx</i> L | <  |   |     |   | >  | <i>yce</i> A | <i>yce</i> A                             | 24.05 |
| 25.79 | <i>ymf</i> ED                                                                       | <i>ymf</i> E | <  |   | HNS |   | >  | <i>lit</i>   | <i>lit</i>                               | 25.82 |
| 26.43 | <i>pli</i> G                                                                        | <i>pli</i> G | <  |   |     |   | >  | <i>ycg</i> L | <i>ycg</i> LM                            | 26.44 |
| 26.56 | <i>nha</i> B                                                                        | <i>nha</i> B | <  |   |     |   | >  | <i>fad</i> R | <i>fad</i> R                             | 26.60 |
| 26.62 | <i>ycg</i> B                                                                        | <i>ycg</i> B | <  |   |     |   | >  | <i>dad</i> A | <i>dad</i> AX                            | 26.66 |
| 27.10 | <i>pth</i> - <i>ych</i> F                                                           | <i>pth</i>   | << |   |     |   | >> | <i>ych</i> H | <i>ych</i> H                             | 27.11 |
| 27.84 | <i>hns</i>                                                                          | <i>hns</i>   | <  |   | HNS |   | >  | <i>tdk</i>   | <i>tdk</i>                               | 27.86 |
| 27.90 | <i>adh</i> E                                                                        | <i>adh</i> E | <  |   |     |   | >  | <i>ych</i> E | <i>ych</i> E                             | 27.97 |
| 29.88 | <i>tpx</i>                                                                          | <i>tpx</i>   | << |   |     |   | >> | <i>ycj</i> G | <i>ycj</i> G                             | 29.89 |
| 29.94 | <i>ycj</i> Y                                                                        | <i>ycj</i> Y | <  |   |     |   | >  | <i>ycj</i> Z | <i>ycj</i> Z                             | 29.96 |
| 31.03 | <i>ldh</i> A                                                                        | <i>ldh</i> A | << |   |     |   | >> | <i>ydb</i> H | <i>ydb</i> H- <i>ynb</i> E- <i>ydb</i> L | 31.06 |
| 31.90 | <i>azo</i> R                                                                        | <i>azo</i> R | <  |   |     |   | >  | <i>hrp</i> A | <i>hrp</i> A                             | 31.92 |
| 32.07 | <i>gap</i> C                                                                        | <i>gap</i> C | << |   |     |   | >  | <i>cyb</i> B | <i>cyb</i> B                             | 32.09 |
| 32.10 | <i>ryd</i> C                                                                        | <i>ryd</i> C | <  |   |     |   | >  | <i>ydc</i> A | <i>ydc</i> A                             | 32.11 |
| 32.16 | <i>ydcl</i>                                                                         | <i>ydcl</i>  | <  |   | HNS |   | >  | <i>ydc</i> J | <i>ydc</i> J                             | 32.19 |
| 32.48 | <i>ync</i> J                                                                        | <i>ync</i> J | <  |   |     |   | >  | <i>hic</i> A | <i>hic</i> AB                            | 32.49 |
| 33.50 | <i>bdm</i> - <i>sra</i>                                                             | <i>bdm</i>   | <  |   | HNS |   | >  | <i>osm</i> C | <i>osm</i> C                             | 33.51 |
| 34.73 | <i>sad</i>                                                                          | <i>sad</i>   | <  |   |     |   | >  | <i>yne</i> J | <i>yne</i> J                             | 34.76 |
| 34.84 | <i>mar</i> C                                                                        | <i>mar</i> C | <  |   |     |   | >  | <i>mar</i> R | <i>mar</i> RAB                           | 34.85 |
| 35.11 | <i>ydf</i> J                                                                        | <i>ydf</i> J | <  |   |     |   | >  | <i>ydf</i> K | <i>ydf</i> K                             | 35.15 |
| 37.00 | <i>anm</i> K                                                                        | <i>anm</i> K | <  |   |     |   | >  | <i>sly</i> B | <i>sly</i> B                             | 37.03 |
| 37.33 | <i>grx</i> D                                                                        | <i>grx</i> D | <  |   | HNS |   | >  | <i>ydh</i> O | <i>ydh</i> O                             | 37.34 |
| 37.44 | <i>ydh</i> B                                                                        | <i>ydh</i> B | <  |   |     |   | >  | <i>ydh</i> C | <i>ydh</i> C                             | 37.46 |
| 37.78 | <i>ydh</i> Z                                                                        | <i>ydh</i> Z | <  |   | HNS |   | >  | <i>pyk</i> F | <i>pyk</i> F                             | 37.80 |
| 38.77 | <i>thr</i> S- <i>inf</i> C- <i>rpm</i> l- <i>rpl</i> T- <i>phe</i> MS- <i>inf</i> A | <i>thr</i> S | <  |   | HNS |   | >  | <i>arp</i> B | <i>arp</i> B                             | 38.82 |

|       |                                      |                |    |  |     |    |               |                          |       |
|-------|--------------------------------------|----------------|----|--|-----|----|---------------|--------------------------|-------|
| 41.11 | <i>kdgR</i>                          | <b>kdgR</b>    | <  |  |     | >  | <i>yebQ</i>   | <i>yebQ</i>              | 41.13 |
| 41.39 | <i>pphA</i>                          | <i>pphA</i>    | <  |  |     | >  | <i>ryeA</i>   | <i>ryeA</i>              | 41.41 |
| 41.90 | <i>yobl</i>                          | <i>yobl</i>    | << |  |     | >> | <i>yebB</i>   | <i>yebB</i>              | 41.91 |
| 41.96 | <i>aspA</i>                          | <i>aspS</i>    | <  |  |     | >  | <i>yecD</i>   | <i>yecDEN</i>            | 42.00 |
| 43.23 | <i>yedD</i>                          | <i>yedD</i>    | <  |  |     | >  | <i>yedE</i>   | <i>yedEF</i>             | 43.24 |
| 43.61 | <i>dsrA</i>                          | <i>dsrA</i>    | << |  |     | >> | <i>yedP</i>   | <i>yedP</i>              | 43.61 |
| 43.89 | <i>yedWV</i>                         | <b>yedW</b>    | << |  |     | >> | <i>yedX</i>   | <i>yedXY</i>             | 43.90 |
| 44.49 | <i>insH-6</i>                        | <i>insH-6</i>  | << |  |     | >> | <i>yoeA</i>   | <i>yoeA</i>              | 44.54 |
| 44.99 | <i>yefM-yoeB</i>                     | <b>yefM</b>    | <  |  |     | >  | <i>hisL</i>   | <i>hisLGDCBHAFI</i>      | 45.00 |
| 48.01 | <i>dusC</i>                          | <i>dusC</i>    | <  |  |     | >  | <i>yohJ</i>   | <i>yohJK</i>             | 48.03 |
| 48.30 | <i>folEyeiB</i>                      | <i>folE</i>    | << |  |     | >> | <i>yeiG</i>   | <i>yeiG</i>              | 48.32 |
| 48.42 | <i>yeiE</i>                          | <b>yeiE</b>    | << |  |     | >> | <i>yeiH</i>   | <i>yeiH</i>              | 48.45 |
| 49.59 | <i>napFDAGHBC-ccmBCDEFGH</i>         | <i>napF</i>    | << |  |     | >> | <i>yojO</i>   | <i>yojO</i>              | 49.61 |
| 49.78 | <i>ompC</i>                          | <i>ompC</i>    | <  |  |     | >  | <i>micF</i>   | <i>micF</i>              | 49.81 |
| 50.90 | <i>yfaZ</i>                          | <i>yfaZ</i>    | <  |  | HNS | >  | <i>nudI</i>   | <i>nudI</i>              | 50.92 |
| 51.81 | <i>lrhA</i>                          | <b>lrhA</b>    | << |  |     | >> | <i>alaA</i>   | <i>alaA</i>              | 51.85 |
| 51.96 | <i>yfbV</i>                          | <i>yfbV</i>    | <  |  |     | >  | <i>ackA</i>   | <i>ackA-pta</i>          | 51.98 |
| 53.46 | <i>emrKV</i>                         | <i>emrK</i>    | <  |  |     | >  | <b>evgA</b>   | <i>evgAS</i>             | 53.49 |
| 53.73 | <i>yfdV</i>                          | <i>yfdY</i>    | <  |  |     | >  | <i>lpxP</i>   | <i>lpxP</i>              | 53.75 |
| 54.02 | <i>glk</i>                           | <i>glk</i>     | <  |  |     | >  | <i>yfeO</i>   | <i>yfeO</i>              | 54.07 |
| 54.09 | <i>mntH</i>                          | <i>mntH</i>    | <  |  |     | >  | <i>nupC</i>   | <i>nupC</i>              | 54.12 |
| 54.40 | <i>yfeR</i>                          | <b>yfeR</b>    | <  |  |     | >  | <i>yfeH</i>   | <i>yfeH</i>              | 54.42 |
| 54.96 | <i>ypeA-yfeZ</i>                     | <i>ypeA</i>    | <  |  |     | >  | <i>amiA</i>   | <i>amiA-hemF</i>         | 54.97 |
| 55.64 | <i>aegA</i>                          | <i>aegA</i>    | << |  |     | >> | <i>narQ</i>   | <i>narQ</i>              | 55.69 |
| 55.80 | <i>ypfM</i>                          | <i>ypfM</i>    | << |  |     | >> | <i>yffB</i>   | <i>yffB-dapE-ypfN</i>    | 55.81 |
| 55.97 | <i>dapA-bamC</i>                     | <i>dapA</i>    | << |  |     | >> | <b>gcvR</b>   | <i>gcvR</i>              | 55.99 |
| 56.43 | <i>upp-uraA</i>                      | <i>upp</i>     | << |  |     | >> | <i>purM</i>   | <i>purMN</i>             | 56.47 |
| 56.70 | <i>guaBA</i>                         | <i>guaB</i>    | << |  |     | >> | <i>xseA</i>   | <i>xseA</i>              | 56.73 |
| 57.34 | <i>trmJ</i>                          | <i>trmJ</i>    | << |  |     | >> | <i>suhB</i>   | <i>suhB</i>              | 57.36 |
| 57.81 | <i>glyA</i>                          | <i>glyA</i>    | << |  |     | >> | <i>hmp</i>    | <i>hmp</i>               | 57.85 |
| 58.35 | <i>rpoE-rseABC</i>                   | <i>rpoE</i>    | << |  |     | >> | <i>nadB</i>   | <i>nadB</i>              | 58.38 |
| 59.32 | <i>ratAB</i>                         | <i>ratA</i>    | <  |  |     | >  | <i>smpB</i>   | <i>smpB</i>              | 59.33 |
| 60.00 | <i>ileY</i>                          | <i>ileY</i>    | << |  | HNS | >  | <i>ygaQ_1</i> | <i>ygaQ_12</i>           | 60.01 |
| 60.24 | <i>yqaE</i>                          | <i>yqaE</i>    | << |  | HNS | >> | <b>ygaV</b>   | <i>ygaVF</i>             | 60.25 |
| 60.83 | <i>mltB</i>                          | <i>mltB</i>    | <  |  | HNS | >  | <i>srlA</i>   | <i>srlAEBD-gutM</i>      | 60.86 |
| 61.61 | <i>ygbI</i>                          | <i>ygbI</i>    | << |  |     | >> | <i>ygbJ</i>   | <i>ygbJK</i>             | 61.63 |
| 62.25 | <i>cysJIH</i>                        | <i>cysJ</i>    | << |  |     | >> | <i>queD</i>   | <i>queD-ygcN</i>         | 62.29 |
| 62.56 | <i>queE</i>                          | <i>queE</i>    | << |  | HNS | >> | <i>yqcG</i>   | <i>ygcG</i>              | 62.58 |
| 64.14 | <i>lysA</i>                          | <i>lysA</i>    | << |  |     | >> | <b>lysR</b>   | <i>lysR</i>              | 64.16 |
| 65.80 | <i>ygfB-pepF-ubiH-visC</i>           | <i>ygfB</i>    | <  |  |     | >  | <i>zapA</i>   | <i>zapA</i>              | 65.82 |
| 67.34 | <i>glcDEFGBA</i>                     | <i>glcD</i>    | <  |  |     | >  | <b>glcC</b>   | <i>glcC</i>              | 67.38 |
| 68.75 | <i>glgS</i>                          | <i>glgS</i>    | <  |  | HNS | >  | <i>yqiJ</i>   | <i>yqiJK</i>             | 68.76 |
| 69.27 | <i>yqjH</i>                          | <i>yqjH</i>    | <  |  |     | >  | <b>yqjI</b>   | <i>yqjI</i>              | 69.29 |
| 69.31 | <i>aer</i>                           | <i>aer</i>     | << |  | HNS | >> | <i>ygjG</i>   | <i>ygjG</i>              | 69.35 |
| 71.93 | <i>mIaFEDCB</i>                      | <i>mIaF</i>    | << |  |     | >> | <i>yrbG</i>   | <i>yrbG-kcsDC-lptCAB</i> | 71.95 |
| 73.51 | <i>envR</i>                          | <b>envR</b>    | <  |  | HNS | >  | <i>acrE</i>   | <i>acrEF</i>             | 73.54 |
| 73.94 | <i>smf</i>                           | <i>smf</i>     | << |  |     | >> | <i>def</i>    | <i>def-fmt</i>           | 73.96 |
| 76.72 | <i>glpEGR</i>                        | <i>glpE</i>    | <  |  |     | >  | <i>glpD</i>   | <i>glpD</i>              | 76.73 |
| 78.33 | <i>yhiN</i>                          | <i>yhiN</i>    | << |  | HNS | >> | <i>pitA</i>   | <i>pitA</i>              | 78.36 |
| 78.58 | <i>dinQ</i>                          | <i>dinQ</i>    | <  |  |     | >  | <b>arsR</b>   | <i>arsRBC</i>            | 78.60 |
| 78.67 | <i>insH-11</i>                       | <i>insH-11</i> | <  |  | HNS | >  | <i>slp</i>    | <i>slp-dctR</i>          | 78.71 |
| 80.49 | <i>bax</i>                           | <i>bax</i>     | <  |  |     | >  | <i>malS</i>   | <i>malS</i>              | 80.51 |
| 81.24 | <i>yibIH</i>                         | <i>yibI</i>    | <  |  |     | >  | <i>mtIA</i>   | <i>mtIADR</i>            | 81.26 |
| 82.01 | <i>waaQGP-rfaS-waaBIJY-rfaZ-waaK</i> | <i>waaQ</i>    | <  |  |     | >  | <i>waaA</i>   | <i>waaA-coaD</i>         | 82.04 |
| 82.28 | <i>ligB</i>                          | <i>ligB</i>    | <  |  |     | >  | <i>gmk</i>    | <i>gmk</i>               | 82.32 |
| 82.60 | <i>yicJI</i>                         | <i>yicJ</i>    | <  |  | HNS | >  | <i>selC</i>   | <i>selC</i>              | 82.64 |
| 83.00 | <i>istR-2</i>                        | <i>istR-2</i>  | << |  |     | >  | <i>tisA</i>   | <i>tisA</i>              | 83.01 |

|           |                       |             |    |     |      |     |             |                            |           |
|-----------|-----------------------|-------------|----|-----|------|-----|-------------|----------------------------|-----------|
| 84.59     | <i>asnC-mioC-mnmG</i> | <b>asnC</b> | <  |     |      | >   | <i>asnA</i> | <i>asnA</i>                | 84.60     |
| 85.06     | <i>yifB</i>           | <i>yifB</i> | <  |     | HNS  | >   | <i>ilvL</i> | <i>ilvLXGM</i>             | 85.10     |
| 85.83     | <i>aslA</i>           | <i>aslA</i> | <  |     |      | >   | <i>glmZ</i> | <i>glmZ</i>                | 85.88     |
| 85.95     | <i>hemCDKY</i>        | <i>hemC</i> | <  |     |      | >   | <i>cyaA</i> | <i>cyaA</i>                | 85.98     |
| 87.95     | <i>fdoGHI-fdhE</i>    | <i>fdoG</i> | <  |     |      | >   | <i>fdhD</i> | <i>fdhD</i>                | 88.02     |
| 88.43     | <i>cpxRA</i>          | <b>cpxR</b> | <  |     |      | >   | <i>cpxP</i> | <i>cpxP</i>                | 88.45     |
| 88.70     | <i>glpFKX</i>         | <i>glpF</i> | <  |     |      | >   | <i>zapB</i> | <i>zapB</i>                | 88.72     |
| 88.86     | <i>priA</i>           | <i>priA</i> | <  |     |      | >   | <i>rpmE</i> | <i>rpmE</i>                | 88.91     |
| 88.93     | <i>metJ</i>           | <b>metJ</b> | <  |     |      | >   | <i>metB</i> | <i>metBL</i>               | 99.94     |
| 91.12     | <i>pepE</i>           | <i>pepE</i> | <  |     |      | >   | <i>rluF</i> | <i>rluF</i>                | 91.14     |
| 91.17     | <i>lysC</i>           | <i>lysC</i> | <  |     |      | >   | <i>pgi</i>  | <i>pgi</i>                 | 91.21     |
| 91.84     | <i>qor</i>            | <i>qor</i>  | <  |     |      | >   | <i>dnaB</i> | <i>dnaB</i>                | 91.87     |
| 92.01     | <i>uvrA</i>           | <i>uvrA</i> | <  |     |      | >   | <i>ssb</i>  | <i>ssb</i>                 | 92.08     |
| 92.09     | <i>yjcB</i>           | <i>yjcB</i> | <  |     | HNS  | >   | <i>yjcC</i> | <i>yjcC</i>                | 92.11     |
| 94.13     | <i>yjeH</i>           | <i>yjeH</i> | <  |     |      | >   | <i>groS</i> | <i>groSL</i>               | 94.16     |
| 95.19     | <i>ulaG</i>           | <i>ulaG</i> | << |     | HNS  | >>  | <i>ulaA</i> | <i>ulaABCDEF</i>           | 95.22     |
| 95.32     | <i>yjfY</i>           | <i>yjfY</i> | <  |     |      | >   | <i>rpsF</i> | <i>rpsF-priB-rpsR-rplI</i> | 95.33     |
| 95.51     | <i>ytfG</i>           | <i>ytfG</i> | <  |     |      | >   | <b>ytfH</b> | <i>ytfH</i>                | 95.53     |
| 96.37     | <i>bdcA</i>           | <i>bdcA</i> | << |     |      | >>  | <b>bdcR</b> | <i>bdcR</i>                | 96.39     |
| 96.46     | <i>argI</i>           | <i>argI</i> | <  |     |      | >   | <i>rraB</i> | <i>rraB</i>                | 96.48     |
| 96.50     | <i>yjgM</i>           | <i>yjgM</i> | << |     | HNS  | >>  | <i>yjgN</i> | <i>yjgN</i>                | 96.51     |
| 96.99     | <i>insG</i>           | <i>insG</i> | << |     |      | >   | <i>yjhB</i> | <i>yjhBC</i>               | 97.03     |
| 97.78     | <i>nanCM</i>          | <i>nanC</i> | << |     | HNS  | >>  | <i>fimB</i> | <i>fimB</i>                | 97.83     |
| 98.46     | <i>yjiR</i>           | <b>yjiR</b> | <  |     |      | >   | <i>yjiS</i> | <i>yjiS</i>                | 98.49     |
| 99.15     | <i>yjjP</i>           | <i>yjjP</i> | <  |     |      | >   | <i>yjjQ</i> | <i>yjjQ-bglJ</i>           | 99.18     |
| 99.21     | <i>fhuF</i>           | <i>fhuF</i> | << |     |      | >>  | <i>yjjZ</i> | <i>yjjZ</i>                | 99.23     |
| 99.84     | <i>rob</i>            | <b>rob</b>  | <  |     | HNS  | >   | <i>creA</i> | <i>creABC</i>              | 99.87     |
| 99.96     | <i>arcA</i>           | <b>arcA</b> | <  |     |      | >   | <i>yjjY</i> | <i>yjjY</i>                | 99.97     |
| 243 genes |                       | 137         |    | 111 | 37x2 | 117 |             | 137                        | 226 genes |
|           |                       | 21 TFs      |    | 81% |      | 85% |             | 15 TFs                     |           |

**Supplemental Table S2B**  
**Constitutive Promoters within Type-B Spacers**

| Map   | Operon                | Left Gene          |    | P | HNS | P | P  | Right Gene         | Operon                | Map   |
|-------|-----------------------|--------------------|----|---|-----|---|----|--------------------|-----------------------|-------|
| 0.43  | <i>insB-1</i>         | <i>insB-1</i>      | << |   |     |   | <  | <i>insAB-1</i>     |                       | 0.43  |
| 2.76  |                       | <i>aceF</i>        | >  |   |     |   | >  | <i>lpd</i>         | <i>lpd</i>            | 0.43  |
| 3.55  |                       | <i>hrpB</i>        | >  |   |     |   | >  | <i>mrcB</i>        | <i>mrcB</i>           | 3.55  |
| 3.61  |                       | <i>mrcB</i>        | >  |   |     |   | >  | <i>fhuA</i>        | <i>fhuACDB</i>        | 3.61  |
| 3.81  |                       | <i>clcA</i>        | >  |   |     |   | >  | <i>erpA</i>        | <i>erpA</i>           | 3.81  |
| 3.96  | <i>yaeH</i>           | <i>yaeH</i>        | <  |   |     |   | <  | <i>yael</i>        |                       | 3.96  |
| 5.76  | <i>ykfA</i>           | <i>ykfA</i>        | <  |   |     |   | <  | <i>perR</i>        |                       | 5.76  |
| 6.22  | <i>argF</i>           | <i>argF</i>        | <  |   |     |   | <  | <i>insAB-3</i>     |                       | 6.22  |
| 6.28  | <i>yagK</i>           | <i>yagK</i>        | <  |   | HNS |   | <  | <i>yagL</i>        |                       | 6.28  |
| 7.15  |                       | <i>betT</i>        | >  |   | HNS |   | >  | <i>yahA</i>        | <i>yahA</i>           | 7.15  |
| 8.17  | <i>frmRAB</i>         | <b><i>frmR</i></b> | <  |   |     |   | <  | <i>yaiO</i>        |                       | 8.17  |
| 9.63  | <i>(cyoABCDE)</i>     | <i>cyoD</i>        | << |   |     |   | <  | <i>cyoC</i>        |                       | 9.63  |
| 9.79  |                       | <i>bolA</i>        | >  |   |     |   | >  | <i>tig</i>         | <i>tig</i>            | 9.79  |
| 9.83  |                       | <i>tig</i>         | >  |   |     |   | >  | <i>clpP</i>        | <i>clpPX</i>          | 9.83  |
| 10.08 |                       | <i>cof</i>         | >  |   |     |   | >  | <b><i>ybaO</i></b> | <i>ybaO</i>           | 10.08 |
| 10.27 | <i>ylaB</i>           | <i>ylaB</i>        | <  |   |     |   | <  | <i>ylaC</i>        |                       | 10.27 |
| 10.30 | <i>ylaC</i>           | <i>ylaC</i>        | <  |   |     |   | <  | <i>maa</i>         |                       | 10.30 |
| 10.32 | <i>maa</i>            | <i>maa</i>         | << |   |     |   | <  | <i>hha</i>         |                       | 10.32 |
| 11.26 |                       | <i>ybbP</i>        | >  |   | HNS |   | >> | <i>rhsD</i>        | <i>rhsDC-yibH</i>     | 11.26 |
| 12.29 |                       | <i>ybcK</i>        | >  |   | HNS |   | >  | <i>ybcL</i>        | <i>ybcLM</i>          | 12.29 |
| 12.56 | <i>ompT</i>           | <i>ompT</i>        | <  |   |     |   | <  | <i>envY</i>        |                       | 12.59 |
| 12.72 | <i>nfrBA</i>          | <i>nfrB</i>        | <  |   |     |   | <  | <i>cusS</i>        |                       | 12.72 |
| 13.02 | <i>nfsB</i>           | <i>nfsB</i>        | <  |   |     |   | <  | <i>ybdF</i>        |                       | 13.02 |
| 13.56 |                       | <i>entH</i>        | >  |   |     |   | >  | <i>cstA</i>        | <i>cstA</i>           | 13.56 |
| 14.15 |                       | <i>pagP</i>        | >  |   |     |   | >  | <i>cspE</i>        | <i>cspE</i>           | 14.15 |
| 14.19 | <i>lipA</i>           | <i>lipA</i>        | <  |   |     |   | <  | <i>ybeF</i>        |                       | 14.19 |
| 14.22 | <i>ybeF</i>           | <b><i>ybeF</i></b> | <  |   |     |   | <  | <i>lipB</i>        |                       | 14.22 |
| 15.30 | <i>uof-fur</i>        | <i>uof</i>         | <  |   |     |   | <  | <i>fldA</i>        |                       | 15.30 |
| 15.31 | <i>fldA</i>           | <i>fldA</i>        | <  |   |     |   | <  | <i>ybfE</i>        |                       | 15.31 |
| 15.32 | <i>ybfE</i>           | <i>ybfE</i>        | <  |   |     |   | <  | <i>ybfF</i>        |                       | 15.32 |
| 15.81 |                       | <i>ybfB</i>        | >  |   | HNS |   | >  | <i>ybfO</i>        | <i>ybfOC</i>          | 15.81 |
| 16.20 | <i>ybgD</i>           | <i>ybgD</i>        | <  |   |     |   | <  | <i>gltA</i>        |                       | 16.20 |
| 16.61 |                       | <i>mngB</i>        | >  |   |     |   | >> | <i>cydA</i>        | <i>cydAB</i>          | 16.61 |
| 16.94 | <i>gpmA</i>           | <i>gpmA</i>        | <  |   |     |   | <  | <i>galM</i>        |                       | 16.94 |
| 17.03 | <i>galETKM</i>        | <i>galE</i>        | <  |   |     |   | <  | <i>modF</i>        |                       | 17.03 |
| 18.07 | <i>fiu</i>            | <i>fiu</i>         | <  |   |     |   | <  | <i>ybiX</i>        |                       | 18.07 |
| 19.21 |                       | <i>nfsA</i>        | >  |   |     |   | >  | <i>rimK</i>        | <i>rimK-ybjN</i>      | 19.21 |
| 19.38 | <i>artJ</i>           | <i>artJ</i>        | <  |   |     |   | <  | <i>artM</i>        |                       | 19.38 |
| 19.45 | <i>artPIQM</i>        | <i>artP</i>        | <  |   |     |   | <  | <i>ybjP</i>        |                       | 19.45 |
| 19.68 | <i>ybjE</i>           | <i>ybjE</i>        | <  |   |     |   | <  | <i>aqpZ</i>        |                       | 19.68 |
| 20.23 |                       | <i>rarA</i>        | >  |   |     |   | >  | <i>serS</i>        | <i>serS</i>           | 20.23 |
| 20.68 |                       | <i>aroA</i>        | >  |   |     |   | >  | <i>ycaL</i>        | <i>ycaL</i>           | 20.68 |
| 21.95 | <i>ompA</i>           | <i>ompA</i>        | <  |   |     |   | <  | <i>sulA</i>        |                       | 21.95 |
| 22.49 | <i>(gfcE-etp-etk)</i> | <i>etp</i>         | << |   |     |   | <  | <i>gfcE</i>        |                       | 22.49 |
| 23.37 |                       | <i>efeB</i>        | >  |   |     |   | >  | <i>phoH</i>        | <i>phoH</i>           | 23.37 |
| 24.14 | <i>bssS</i>           | <i>bssS</i>        | <  |   |     |   | <  | <i>dinI</i>        |                       | 24.14 |
| 24.44 |                       | <i>flgF</i>        | >  |   |     |   | >  | <i>flgG</i>        | <i>(flgBCDEFGHIJ)</i> | 24.44 |
| 24.80 |                       | <i>fabG</i>        | >  |   |     |   | >  | <i>acpP</i>        | <i>acpP-fabF</i>      | 24.80 |

|       |                            |                    |    |  |     |    |                    |                             |       |
|-------|----------------------------|--------------------|----|--|-----|----|--------------------|-----------------------------|-------|
| 24.84 |                            | <i>fabF</i>        | >  |  |     | >> | <i>pabC</i>        | <i>pabCG-tmk-holB-ycfH</i>  | 24.84 |
| 25.12 |                            | <i>ycfP</i>        | >  |  |     | >  | <i>ndh</i>         | <i>ndh</i>                  | 25.12 |
| 25.21 | <i>mfd</i>                 | <i>mfd</i>         | <  |  |     | <  | <i>ycfT</i>        |                             | 25.21 |
| 25.78 |                            | <i>icd</i>         | >  |  |     | >  | <i>C0293</i>       | <i>C0293</i>                | 25.78 |
| 26.07 |                            | <i>pinE</i>        | >  |  |     | >  | <i>mcrA</i>        | <i>mcrA</i>                 | 26.07 |
| 26.13 | <i>bluR</i>                | <b><i>bluR</i></b> | << |  |     | <  | <i>ycgF</i>        |                             | 26.13 |
| 26.22 |                            | <i>ymgC</i>        | >  |  |     | >  | <i>ycgG</i>        | <i>ycgG</i>                 | 26.22 |
| 26.27 |                            | <i>ymgF</i>        | >  |  |     | >> | <i>ycgH</i>        | <i>ycgH</i>                 | 26.27 |
| 26.51 |                            | <i>C0299</i>       | >  |  |     | >  | <i>umuD</i>        | <i>umuDC</i>                | 26.51 |
| 27.07 | <i>(pth-ychF)</i>          | <i>ychF</i>        | <  |  |     | <  | <i>pth</i>         |                             | 27.07 |
| 27.72 |                            | <i>narI</i>        | >  |  |     | >  | <i>ychS</i>        | <i>ychS</i>                 | 27.72 |
| 28.00 |                            | <i>ychE</i>        | >  |  |     | >> | <i>oppA</i>        | <i>oppABCDF</i>             | 28.00 |
| 28.44 | <i>(trpLEDCBA)</i>         | <i>trpE</i>        | << |  |     | <  | <i>trpL</i>        |                             | 28.44 |
| 28.51 |                            | <i>yciO</i>        | >  |  |     | >  | <i>yciQ</i>        | <i>yciQ</i>                 | 28.51 |
| 28.71 |                            | <i>topA</i>        | >  |  | HNS | >  | <b><i>cysB</i></b> | <i>cysB</i>                 | 28.71 |
| 28.84 |                            | <i>pgpB</i>        | >  |  |     | >  | <i>yciS</i>        | <i>yciSM</i>                | 28.84 |
| 28.12 | <i>osmB</i>                | <i>osmB</i>        | <  |  | HNS | <  | <i>yciT</i>        |                             | 28.12 |
| 29.06 | <i>fabI</i>                | <i>fabI</i>        | <  |  |     | <  | <i>ycjD</i>        |                             | 29.06 |
| 29.08 | <i>ycjD</i>                | <i>ycjD</i>        | <  |  |     | <  | <i>sapF</i>        |                             | 29.08 |
| 29.17 | <i>sapABCDF</i>            | <i>sapA</i>        | <  |  |     | <  | <i>ymjA</i>        |                             | 29.17 |
| 30.86 | <i>ynaE</i>                | <b><i>ynaE</i></b> | <  |  | HNS | <  | <i>uspF</i>        |                             | 30.86 |
| 31.32 |                            | <i>paaB</i>        | >  |  |     | >  | <i>paaC</i>        | <i>paaCDEFGHIJK</i>         | 31.32 |
| 32.34 |                            | <i>tehB</i>        | >  |  |     | >  | <i>ydcL</i>        | <i>ydcL</i>                 | 32.34 |
| 32.89 |                            | <i>yncH</i>        | >  |  |     | >> | <i>rhsE</i>        | <i>rhsE</i>                 | 32.89 |
| 32.95 |                            | <i>yncl</i>        | >  |  |     | >  | <i>yncM</i>        | <i>yncM</i>                 | 32.95 |
| 34.10 | <i>ydeP</i>                | <i>ydeP</i>        | <  |  | HNS | <  | <i>ydeQ</i>        |                             | 34.10 |
| 34.27 | <i>hipBA</i>               | <i>hipB</i>        | <  |  |     | <  | <i>ydeU</i>        |                             | 34.27 |
| 34.28 | <i>ydeK</i>                | <i>ydeK</i>        | <  |  | HNS | <  | <i>lsrK</i>        |                             | 34.28 |
| 35.31 | <i>essQ-ydfr-rrrQ-ydfP</i> | <i>essQ</i>        | << |  | HNS | <  | <i>cspB</i>        |                             | 35.31 |
| 35.51 |                            | <i>dicF</i>        | >  |  |     | >  | <i>dicB</i>        | <i>dicB-ydfDE-insD-intQ</i> | 35.51 |
| 35.58 | <i>(rspAB)</i>             | <i>rspB</i>        | <  |  |     | <  | <i>rspA</i>        |                             | 35.58 |
| 35.60 | <i>rspAB</i>               | <i>rspA</i>        | <  |  |     | <  | <i>ynfA</i>        |                             | 35.60 |
| 35.98 |                            | <i>ynfM</i>        | >  |  | HNS | >  | <i>asr</i>         | <i>asr</i>                  | 35.98 |
| 36.26 |                            | <i>rstB</i>        | >  |  |     | >  | <i>tus</i>         | <i>tus</i>                  | 36.26 |
| 37.36 |                            | <i>ydhO</i>        | >  |  |     | >> | <i>sodB</i>        | <i>sodB</i>                 | 37.36 |
| 37.49 |                            | <i>ydhC</i>        | >  |  |     | >  | <i>cfa</i>         | <i>cfa</i>                  | 37.49 |
| 37.98 | <i>sufABCDS</i>            | <i>sufA</i>        | <  |  |     | <  | <i>rydB</i>        |                             | 37.98 |
| 38.00 | <i>ydiH</i>                | <i>ydiH</i>        | <  |  |     | <  | <i>ydiI</i>        |                             | 38.00 |
| 38.12 |                            | <i>rprA</i>        | >  |  |     | >  | <i>ydiL</i>        | <i>ydiL</i>                 | 38.12 |
| 38.53 |                            | <i>aroH</i>        | >  |  | HNS | >  | <i>ydiE</i>        | <i>ydiE</i>                 | 38.53 |
| 38.97 |                            | <i>yniC</i>        | >  |  |     | >  | <i>ydjM</i>        | <i>ydjM</i>                 | 38.97 |
| 38.99 |                            | <i>ydjM</i>        | >  |  |     | >  | <i>ydjN</i>        | <i>ydjN</i>                 | 38.99 |
| 39.02 | <i>ydjO</i>                | <i>ydjO</i>        | <  |  | HNS | <  | <i>cedA</i>        |                             | 39.02 |
| 39.26 |                            | <i>nadE</i>        | >  |  |     | >  | <i>cho</i>         | <i>cho</i>                  | 39.26 |
| 39.28 | <i>ves</i>                 | <i>ves</i>         | <  |  | HNS | <  | <i>spy</i>         |                             | 39.28 |
| 39.92 | <i>ydjF</i>                | <b><i>ydjF</i></b> | <  |  |     | <  | <i>ydjG</i>        |                             | 39.92 |
| 40.31 |                            | <i>yeaI</i>        | >  |  |     | >  | <i>yeaJ</i>        | <i>yeaJ</i>                 | 40.31 |
| 40.46 | <i>yeaQ</i>                | <i>yeaQ</i>        | << |  |     | <  | <i>yeaG</i>        |                             | 40.46 |
| 40.65 | <i>fadD</i>                | <i>fadD</i>        | <  |  |     | <  | <i>yeaY</i>        |                             | 40.65 |
| 41.07 | <i>yobF-cspC</i>           | <i>yobF</i>        | <  |  | HNS | <  | <i>yebO</i>        |                             | 41.07 |
| 41.18 | <i>prc</i>                 | <i>prc</i>         | <  |  |     | <  | <i>proQ</i>        |                             | 41.18 |
| 41.46 |                            | <i>holE</i>        | >  |  |     | >  | <i>yobB</i>        | <i>yobB-exoX</i>            | 41.46 |
| 41.53 | <i>yebE</i>                | <i>yebE</i>        | <  |  |     | <  | <i>yebF</i>        |                             | 41.53 |

|       |                          |                    |    |  |     |    |                    |                       |       |
|-------|--------------------------|--------------------|----|--|-----|----|--------------------|-----------------------|-------|
| 41.62 | <i>edd-eda</i>           | <i>edd</i>         | <  |  |     | <  | <i>zwf</i>         |                       | 41.62 |
| 42.14 | <i>torYZ</i>             | <i>torY</i>        | <  |  | HNS | <  | <i>cutC</i>        |                       | 42.14 |
| 42.90 | <i>pgsA</i>              | <i>pgsA</i>        | << |  |     | <  | <i>uvrC</i>        |                       | 42.90 |
| 42.98 | <i>sdiA</i>              | <b><i>sdiA</i></b> | <  |  | HNS | <  | <i>yecC</i>        |                       | 42.98 |
| 43.07 | <i>(fliAZY)</i>          | <i>fliZ</i>        | << |  |     | <  | <i>fliA</i>        |                       | 43.07 |
| 43.96 |                          | <i>yedZ</i>        | >  |  |     | >  | <i>zinT</i>        | <i>zinT</i>           | 43.96 |
| 44.29 |                          | <i>amn</i>         | >  |  | HNS | >  | <i>yeeN</i>        | <i>yeeN</i>           | 44.29 |
| 44.47 | <i>cobUST</i>            | <i>cobU</i>        | <  |  |     | <  | <i>insH-6</i>      |                       | 44.47 |
| 44.60 |                          | <i>yeeP</i>        | >  |  |     | >  | <i>isrC</i>        | <i>isrC</i>           | 44.60 |
| 44.77 | <i>yeeX</i>              | <i>yeeX</i>        | <  |  |     | <  | <i>yeeA</i>        |                       | 44.77 |
| 45.48 | <i>rfbBDACX</i>          | <i>rfbB</i>        | <  |  | HNS | <  | <i>galF</i>        |                       | 45.48 |
| 46.62 |                          | <i>baeR</i>        | >  |  |     | >  | <i>yegP</i>        | <i>yegP</i>           | 46.62 |
| 46.67 | <i>ogrK</i>              | <b><i>ogrK</i></b> | <  |  |     | <  | <i>yegZ</i>        |                       | 46.67 |
| 47.00 | <i>yegX</i>              | <i>yegX</i>        | <  |  |     | <  | <i>thiD</i>        |                       | 47.00 |
| 47.63 | <i>yehS</i>              | <i>yehS</i>        | <  |  |     | <  | <i>yehT</i>        |                       | 47.63 |
| 47.89 | <i>pbpG</i>              | <i>pbpG</i>        | <  |  |     | <  | <i>yohC</i>        |                       | 47.89 |
| 49.05 | <i>yejG</i>              | <i>yejG</i>        | <  |  |     | <  | <i>bcr</i>         |                       | 49.05 |
| 49.23 |                          | <i>yejM</i>        | >  |  |     | >  | <i>proL</i>        | <i>proL</i>           | 49.23 |
| 49.64 | <i>mqo</i>               | <i>mqo</i>         | << |  | HNS | <  | <i>yojI</i>        |                       | 49.64 |
| 50.40 | <i>yfaL</i>              | <i>yfaL</i>        | <  |  | HNS | <  | <i>ypaB</i>        |                       | 50.40 |
| 51.11 | <i>pmrD</i>              | <i>pmrD</i>        | <  |  |     | <  | <i>menE</i>        |                       | 51.11 |
| 51.78 | <i>nuoABCDEFGHIJKLMN</i> | <i>nuoA</i>        | << |  |     | <  | <i>lrhA</i>        |                       | 51.78 |
| 52.25 | <i>hisJQMP</i>           | <i>hisJ</i>        | <  |  |     | <  | <i>argT</i>        |                       | 52.25 |
| 52.87 | <i>yfcV</i>              | <i>yfcV</i>        | << |  | HNS | <  | <i>sixA</i>        |                       | 52.87 |
| 53.61 | <i>yfdV</i>              | <i>yfdV</i>        | <  |  | HNS | <  | <i>oxc</i>         |                       | 53.61 |
| 53.67 | <i>frc</i>               | <i>frc</i>         | <  |  | HNS | <  | <i>yfdX</i>        |                       | 53.67 |
| 54.54 |                          | <i>cysZ</i>        | >  |  |     | >> | <i>cysK</i>        | <i>cysK</i>           | 54.54 |
| 55.21 |                          | <i>yffP</i>        | >  |  |     | >  | <i>yffQ</i>        | <i>yffQR</i>          | 55.21 |
| 55.23 |                          | <i>yffR</i>        | >  |  |     | >  | <i>yffS</i>        | <i>yffS</i>           | 55.23 |
| 56.02 |                          | <i>bcp</i>         | >  |  |     | >  | <i>hyfA</i>        | <i>hyfABCDEFGHIJR</i> | 56.02 |
| 56.40 | <i>(upp-uraA)</i>        | <i>uraA</i>        | <  |  |     | <  | <i>upp</i>         |                       | 56.40 |
| 57.18 | <i>pepB</i>              | <i>pepB</i>        | << |  |     | <  | <i>iscX</i>        |                       | 57.18 |
| 57.96 | <i>glmY</i>              | <i>glmY</i>        | <  |  |     | <  | <i>purL</i>        |                       | 57.96 |
| 58.15 | <i>ryfB</i>              | <i>ryfB</i>        | << |  |     | <  | <i>shoB</i>        |                       | 58.15 |
| 58.68 | <i>kgtP</i>              | <i>kgtP</i>        | <  |  |     | <  | <i>rrfG</i>        |                       | 58.68 |
| 59.27 |                          | <i>nadK</i>        | >  |  |     | >  | <i>recN</i>        | <i>recN</i>           | 59.27 |
| 59.35 |                          | <i>smpB</i>        | >  |  |     | >> | <i>ssrA</i>        | <i>ssrA</i>           | 59.35 |
| 59.36 |                          | <i>ssrA</i>        | >  |  |     | >  | <i>intA</i>        | <i>intA</i>           | 59.36 |
| 59.52 | <i>yfjLK</i>             | <i>yfjL</i>        | <  |  |     | <  | <i>yfjM</i>        |                       | 59.52 |
| 59.61 |                          | <i>yfjO</i>        | >  |  |     | >  | <i>yfjP</i>        | <i>yfjPQ</i>          | 59.61 |
| 59.79 |                          | <i>yfjW</i>        | >  |  |     | >> | <i>yfjX</i>        | <i>yfjXYZ-ypjF</i>    | 59.79 |
| 60.46 |                          | <i>proW</i>        | >  |  |     | >  | <i>proX</i>        | <i>(proVWX)</i>       | 60.46 |
| 60.51 |                          | <i>ygaY</i>        | >  |  |     | >  | <i>ygaZ</i>        | <i>ygaZH</i>          | 60.51 |
| 60.92 |                          | <i>srlD</i>        | >  |  |     | >  | <b><i>gutM</i></b> | <i>gutM-srlRQ</i>     | 60.92 |
| 61.31 | <i>(hycABCDEFGHI)</i>    | <i>hycD</i>        | <  |  |     | <  | <i>hycC</i>        |                       | 61.31 |
| 61.59 |                          | <i>mutS</i>        | >  |  | HNS | >  | <i>pphB</i>        | <i>pphB</i>           | 61.59 |
| 62.01 | <i>(cusABCDE12)</i>      | <i>cas1</i>        | << |  |     | <  | <i>casE</i>        |                       | 62.01 |
| 62.70 | <i>mazEFG</i>            | <i>chpR</i>        | <  |  |     | <  | <i>relA</i>        |                       | 62.70 |
| 63.94 | <i>rppH-ptsP</i>         | <i>rppH</i>        | <  |  |     | <  | <i>ygdT</i>        |                       | 63.94 |
| 64.26 | <i>kdul</i>              | <i>kdul</i>        | <  |  |     | <  | <i>yqeF</i>        |                       | 64.26 |
| 64.43 |                          | <i>ygeF</i>        | >  |  |     | >  | <i>ygeG</i>        | <i>ygeG</i>           | 64.43 |
| 64.49 |                          | <i>ygel</i>        | >  |  |     | >  | <i>pbl</i>         | <i>pbi</i>            | 64.49 |
| 65.59 | <i>ygfF</i>              | <i>ygfF</i>        | <  |  |     | <  | <i>gcvP</i>        |                       | 65.59 |

|       |                       |                    |    |  |     |  |    |                    |                            |       |
|-------|-----------------------|--------------------|----|--|-----|--|----|--------------------|----------------------------|-------|
| 65.82 |                       | <i>zapA</i>        | >  |  |     |  | >> | <i>ssrS</i>        | <i>ssrS-fau</i>            | 65.82 |
| 65.84 |                       | <i>ygfA</i>        | >  |  |     |  | >  | <i>sibC</i>        | <i>sibC</i>                | 65.84 |
| 66.18 | <i>epd-pgk-fbaA</i>   | <i>epd</i>         | <  |  |     |  | <  | <i>yggC</i>        |                            | 66.18 |
| 67.06 | <i>pppA</i>           | <i>pppA</i>        | << |  |     |  | <  | <i>yghJ</i>        |                            | 67.06 |
| 67.93 |                       | <i>metC</i>        | >  |  |     |  | >  | <i>yghB</i>        | <i>yghB</i>                | 67.93 |
| 68.24 | <i>mqsRA</i>          | <i>mqsR</i>        | <  |  |     |  | <  | <i>ygiV</i>        |                            | 68.24 |
| 68.25 | <i>ygiV</i>           | <b><i>ygiV</i></b> | << |  |     |  | <  | <i>ygiW</i>        |                            | 68.25 |
| 68.40 | <i>(tolC-ygjABC)</i>  | <i>yqiA</i>        | <  |  |     |  | <  | <i>cpdA</i>        |                            | 68.40 |
| 68.61 |                       | <i>yqiC</i>        | >  |  | HNS |  | >  | <i>ygiL</i>        | <i>ygiL</i>                | 68.61 |
| 69.10 |                       | <i>ttdB</i>        | >  |  |     |  | >  | <i>ttdT</i>        | <i>ttdABT</i>              | 69.10 |
| 69.42 |                       | <i>ebgR</i>        | >  |  |     |  | >  | <i>ebgA</i>        | <i>ebgAC</i>               | 69.42 |
| 69.55 |                       | <i>ygjJ</i>        | >  |  |     |  | >> | <i>ygjK</i>        | <i>(ygjJK)</i>             | 69.55 |
| 69.79 |                       | <i>alx</i>         | >  |  |     |  | >  | <i>sstT</i>        | <i>sstT</i>                | 69.79 |
| 69.93 |                       | <i>exuT</i>        | >  |  |     |  | >  | <b><i>exuR</i></b> | <i>exuR</i>                | 69.93 |
| 69.96 |                       | <i>exuR</i>        | >  |  |     |  | >  | <i>yqjA</i>        | <i>yqjA-mzrA</i>           | 69.96 |
| 70.39 |                       | <i>tdcR</i>        | >  |  | HNS |  | >  | <i>yhaB</i>        | <i>yhaBC</i>               | 70.39 |
| 70.48 | <i>(garPLRK-rrpB)</i> | <i>garR</i>        | << |  |     |  | <  | <i>garL</i>        |                            | 70.48 |
| 71.84 |                       | <i>ispB</i>        | >  |  |     |  | >  | <b><i>sfsB</i></b> | <i>sfsB</i>                | 71.84 |
| 72.74 | <i>sspAB</i>          | <i>sspA</i>        | <  |  |     |  | <  | <i>rpsL</i>        |                            | 72.74 |
| 72.93 |                       | <i>argR</i>        | >  |  | HNS |  | >  | <i>yhcN</i>        | <i>yhcN</i>                | 72.93 |
| 73.46 |                       | <i>prmA</i>        | >  |  |     |  | >  | <i>dusB</i>        | <i>dusB-fis</i>            | 73.46 |
| 74.68 | <i>bfd-bfr</i>        | <i>bfd</i>         | <  |  |     |  | <  | <i>chiA</i>        |                            | 74.68 |
| 74.87 | <i>yheO-tusDCB</i>    | <b><i>yheO</i></b> | <  |  |     |  | <  | <i>fkpA</i>        |                            | 74.87 |
| 75.03 |                       | <i>yheS</i>        | >  |  | HNS |  | >> | <i>yheT</i>        | <i>(yheST)</i>             | 75.03 |
| 75.39 |                       | <i>yhfL</i>        | >  |  |     |  | >  | <i>friA</i>        | <i>friABCDR</i>            | 75.39 |
| 76.26 |                       | <i>yhgF</i>        | >  |  | HNS |  | >  | <i>feoA</i>        | <i>feoABC</i>              | 76.26 |
| 77.07 | <i>gntR</i>           | <b><i>gntR</i></b> | << |  |     |  | <  | <i>yhhW</i>        |                            | 77.07 |
| 77.55 | <i>rpoH</i>           | <i>rpoH</i>        | <  |  |     |  | <  | <i>ftsX</i>        |                            | 77.55 |
| 78.19 | <i>yhil-rbbA-yhhJ</i> | <i>yhil</i>        | <  |  |     |  | <  | <i>yhiJ</i>        |                            | 78.19 |
| 78.22 | <i>yhiJ</i>           | <i>yhiJ</i>        | <  |  |     |  | <  | <i>yhiK</i>        |                            | 78.22 |
| 78.65 |                       | <i>arsC</i>        | >  |  | HNS |  | >  | <i>yhiS</i>        | <i>yhiS</i>                | 78.65 |
| 78.76 | <i>(hdeABD)</i>       | <i>hdeB</i>        | <  |  | HNS |  | <  | <i>hdeA</i>        |                            | 78.76 |
| 79.79 | <i>(dppABCDF)</i>     | <i>dppC</i>        | << |  |     |  | <  | <i>dppB</i>        |                            | 79.79 |
| 80.65 |                       | <i>yiaK</i>        | >  |  |     |  | >  | <i>yiaL</i>        | <i>yiaKLMNO-lyxK-sgbHU</i> | 80.65 |
| 80.87 | <i>yiaWV</i>          | <i>yiaW</i>        | <  |  | HNS |  | <  | <i>aldB</i>        |                            | 80.87 |
| 81.79 |                       | <i>waaC</i>        | >  |  |     |  | >  | <i>rfaL</i>        | <i>(rfaD-waaFC-rfaL)</i>   | 81.79 |
| 82.24 |                       | <i>yicC</i>        | >  |  |     |  | >  | <i>dinD</i>        | <i>dinD</i>                | 82.24 |
| 84.18 | <i>pstB-phoU</i>      | <i>pstB</i>        | <  |  |     |  | <  | <i>pstA</i>        |                            | 84.18 |
| 85.30 | <i>ppiC</i>           | <i>ppiC</i>        | <  |  |     |  | <  | <i>yifO</i>        |                            | 85.30 |
| 87.25 |                       | <i>polA</i>        | >  |  |     |  | >  | <i>spf</i>         | <i>spf</i>                 | 87.25 |
| 87.36 | <i>glnLG</i>          | <i>glnL</i>        | <  |  |     |  | <  | <i>glnA</i>        |                            | 87.36 |
| 87.47 |                       | <i>typA</i>        | >  |  |     |  | >  | <i>yihL</i>        | <i>yihLM</i>               | 87.47 |
| 88.49 |                       | <i>fieF</i>        | >  |  |     |  | >  | <i>pfkA</i>        | <i>pfkA</i>                | 88.49 |
| 88.73 | <i>rraA</i>           | <i>rraA</i>        | <  |  |     |  | <  | <i>menA</i>        |                            | 88.73 |
| 90.08 |                       | <i>rplL</i>        | >  |  |     |  | >> | <i>rpoB</i>        | <i>(rplKAJL-rpoBC)</i>     | 90.08 |
| 90.27 | <i>sroH</i>           | <i>sroH</i>        | <  |  |     |  | <  | <i>thiH</i>        |                            | 90.27 |
| 92.24 | <i>yjcF</i>           | <i>yjcF</i>        | <  |  | HNS |  | <  | <i>actP</i>        |                            | 92.24 |
| 92.52 |                       | <i>nrfG</i>        | >  |  | HNS |  | >  | <i>glpP</i>        | <i>glpP</i>                | 92.52 |
| 92.56 | <i>yjcO</i>           | <i>yjcO</i>        | <  |  |     |  | <  | <i>fdhF</i>        |                            | 92.56 |
| 93.18 | <i>yjdN</i>           | <i>yjdN</i>        | <  |  |     |  | <  | <i>yjdM</i>        |                            | 93.18 |
| 93.46 | <i>adiA</i>           | <i>adiA</i>        | <  |  | HNS |  | <  | <i>melR</i>        |                            | 93.46 |
| 93.90 | <i>cadBA</i>          | <i>cadB</i>        | <  |  |     |  | <  | <i>cadC</i>        |                            | 93.90 |
| 94.05 | <i>dcuA</i>           | <i>dcuA</i>        | << |  |     |  | <  | <i>aspA</i>        |                            | 94.05 |

|                         |                   |             |    |                                                                                   |        |                                                                                     |    |             |                              |       |
|-------------------------|-------------------|-------------|----|-----------------------------------------------------------------------------------|--------|-------------------------------------------------------------------------------------|----|-------------|------------------------------|-------|
| 94.22                   | <i>yjeJ</i>       | <i>yjeJ</i> | <  |  |        |                                                                                     | <  | <i>yjeK</i> |                              | 94.22 |
| 94.29                   |                   | <i>ecnB</i> | >  |                                                                                   |        |  | >  | <i>sugE</i> | <i>sugE</i>                  | 94.29 |
| 94.89                   |                   | <i>yjeT</i> | >  |                                                                                   |        |  | >  | <i>purA</i> | <i>purA</i>                  | 94.89 |
| 95.01                   |                   | <i>rlmB</i> | >  |                                                                                   | HNS    |                                                                                     | >  | <i>yjfl</i> | <i>(nsrR-rnr-rlmB-yjflJ)</i> | 95.01 |
| 95.35                   |                   | <i>rpsR</i> | >  |                                                                                   |        |                                                                                     | >> | <i>rplI</i> | <i>(rpsF-priB-rpsR-rplI)</i> | 95.35 |
| 95.44                   |                   | <i>fkIB</i> | >  |                                                                                   |        |  | >  | <i>cycA</i> | <i>cycA</i>                  | 95.44 |
| 95.44                   | <i>nrdD</i>       | <i>nrdD</i> | <  |  |        |                                                                                     | <  | <i>treC</i> |                              | 96.10 |
| 97.36                   | <i>yjhU</i>       | <i>yjhU</i> | <  |  |        |                                                                                     | <  | <i>yjhF</i> |                              | 97.36 |
| 97.49                   | <i>yjhHG</i>      | <i>yjhI</i> | <  |                                                                                   |        |                                                                                     | <  | <i>sgcR</i> |                              | 97.49 |
| 97.61                   | <i>sgcXBCQAER</i> | <i>sgcX</i> | << |                                                                                   |        |                                                                                     | <  | <i>yjhP</i> |                              | 97.61 |
| 97.85                   |                   | <i>fimB</i> | >  |                                                                                   | HNS    |  | >  | <i>fimE</i> | <i>fimE</i>                  | 97.85 |
| 97.88                   |                   | <i>fimE</i> | >  |                                                                                   | HNS    |  | >  | <i>fimA</i> | <i>fimAICDFGH</i>            | 97.88 |
| 98.12                   |                   | <i>uxuB</i> | >  |                                                                                   |        |  | >  | <i>uxuR</i> | <i>uxuR</i>                  | 98.12 |
| 98.20                   | <i>iadA</i>       | <i>iadA</i> | <  |  |        |                                                                                     | <  | <i>yjiG</i> |                              | 98.20 |
| 98.30                   | <i>yjiK</i>       | <i>yjiK</i> | <  |                                                                                   |        |                                                                                     | <  | <i>yjiL</i> |                              | 98.30 |
| 98.51                   |                   | <i>yjiS</i> | >  |  |        |                                                                                     | >  | <i>yjiT</i> | <i>yjiT</i>                  | 98.51 |
| 98.63                   | <i>mcrBC</i>      | <i>mcrB</i> | <  |                                                                                   |        |                                                                                     | <  | <i>symE</i> |                              | 98.63 |
| 99.52                   |                   | <i>deoA</i> | >  |                                                                                   |        |                                                                                     | >> | <i>deoB</i> | <i>(deoCABD)</i>             | 99.52 |
| 99.57                   |                   | <i>deoD</i> | >  |                                                                                   | HNS    |  | >  | <i>yjjJ</i> | <i>yjjJ</i>                  | 99.57 |
| 123 operons (213 genes) |                   | 123         |    |                                                                                   | 227    |                                                                                     |    | 105         | 105 operons (190 genes)      |       |
| (Internal promoter 13)  |                   |             |    |                                                                                   | HNS 41 |                                                                                     |    |             | (Internal promoter 10)       |       |
